# Supplementary material
Source: PubMed Central journal article supplement (PMC9513709)
Supplement: jama-e2217985-s001.pdf [file jama-e2217985-s001.pdf]

## Supplemental Online Content

Kelly JD, Leonard S, Hoggatt KJ, et al. Incidence of severe COVID-19 illness following vaccination and booster with BNT162b2, mRNA-1273, and Ad26.COV2.S vaccines. *JAMA*. Published online September 26, 2022. doi:10.1001/jama.2022.17985

**eAppendix 1.** COVID-19 Pneumonia Ascertainment Using a Combination Text-Processing Facilitated Chart Review and ICD Codes

**eAppendix 2.** Reasons for Hospitalization

**eAppendix 3.** Variable Definitions

**eFigure 1.** Cohort Selection in a Study of U.S. Veterans Who Received Booster Vaccination for COVID-19

**eFigure 2.** Map of VA Regions

**eTable 1.** Incidence of Hospitalization With COVID-19 Pneumonia/Death Following Vaccination and Boosters With Follow-up Time Ending on Date of 4<sup>th</sup> Dose, by Overall Cohort and Immunocompromised Subgroup

**eTable 2.** Characteristics of the Boosted Cohort by Combination of Vaccination Series

**eTable 3.** Characteristics of Cohort by Outcome

**eTable 4.** Incidence of Outcomes Following Vaccination and Booster With mRNA-1273 x3, BNT162b2 x3, and Ad26.COV2.S x2 by Delta Variant vs Omicron Variant Eras

This supplemental material has been provided by the authors to give readers additional information about their work.

## eAppendix 1. COVID-19 Pneumonia Ascertainment Using a Combination Text-Processing Facilitated Chart Review and ICD Codes

To develop a text processing algorithm for rapid chart review, we stratified hospitalizations by the ICD code J12.82 and the presence of the word pneumonia in the medical record. We searched the VA medical record during the hospitalization period for the word “pneumonia” using a text processing tool available on the VA Informatics and Computing Infrastructure. Using the text processing tool and the ICD coded J12.82, we stratified a sample of hospitalizations into 4 groups: A) those with a discharge diagnosis of J12.82 and the word pneumonia in their notes B) those without a discharge diagnosis of J12.82 but who had the word pneumonia in their notes C) those with a discharge diagnosis of J12.82 but no note containing the word pneumonia and D) those with neither the code J12.82 nor the word pneumonia in their notes.

| <b>Algorithm to identify patients admitted with COVID pneumonia<br/>(Total Reviewed to Develop Algorithm N=594)</b> |                                    |                                   |
|---------------------------------------------------------------------------------------------------------------------|------------------------------------|-----------------------------------|
|                                                                                                                     | Discharge diagnosis J12.82 present | Discharge diagnosis J12.82 absent |
| Discharge summary or another note contains the word “pneumonia”                                                     | A=222                              | B=202                             |
| No note contains “pneumonia”                                                                                        | C=3                                | D=167                             |

A: There were 222 patients who were discharged with the ICD code J12.82 and had the word pneumonia in hospital notes or in the discharge summary. We reviewed a random sample of 25 cases. All 25 cases had documented COVID pneumonia.

B: There were 202 patients who did not have a discharge diagnosis of J12.82 but had the word pneumonia in hospital notes or in the discharge summary. We reviewed all 202 cases. Among the 202 cases review, 34 were identified by the care team as having COVID-19 pneumonia.

C: There were 3 hospitalizations with a discharge diagnosis of J12.82 but no note containing the word pneumonia. We reviewed all 3 cases. Among the 3 cases, two cases were identified by the care team as having COVID-19 pneumonia.

D: There were 167 cases with neither the code J12.82 nor the word pneumonia in their notes. We reviewed a random sample of 50 charts in this category. No patient was identified as having COVID-19 pneumonia in this group.

This algorithm demonstrated that all cases randomly sampled in Box A (cases with both the diagnosis code and the word pneumonia in the chart) were COVID-19 pneumonia and in Box B (cases without the code J12.82 and without the word pneumonia in the chart) were not COVID-19 pneumonia. Therefore, we did not conduct any further chart review of cases identified in Boxes A and B. This algorithm further demonstrated the presence of inconsistencies among cases identified in Boxes B and C. For example, some cases were COVID-19 pneumonia even though the discharge diagnosis of J12.82 was absent. Therefore, we decided to conduct chart review of all cases identified in these Boxes (B and C). This algorithm was then applied to all patients who were hospitalized in the follow-up period.

## eAppendix 2. Reasons for Hospitalization

We reviewed a random sample of 50 charts of patients who were hospitalized within 30 days post breakthrough infection who did not have COVID-19 pneumonia. Among these 50 patients, 15 patients (30%) were diagnosed by the care team as having COVID-related hospitalizations.

| Reasons for hospitalization                                                                                                                                                | COVID-related (yes/no) |
|----------------------------------------------------------------------------------------------------------------------------------------------------------------------------|------------------------|
| Admitted for nephrectomy due to cancer (right renal mass s/p open right radical nephrectomy)                                                                               | No                     |
| Bacterial pneumonia, COPD exacerbation                                                                                                                                     | Yes                    |
| Musculoskeletal pain, Cough d/t covid or heavy lifting from work                                                                                                           | Yes                    |
| COVID-19 associated nausea/vomiting                                                                                                                                        | Yes                    |
| Atrial fibrillation, asymptomatic COVID-19 screening test during planned admission for cardioversion                                                                       | No                     |
| Alcohol withdrawal, asymptomatic covid                                                                                                                                     | No                     |
| Chest pain during dialysis, no mention of COVID, tested positive 12 days prior to hospitalization                                                                          | No                     |
| Alcohol withdrawal, COVID-19 outside window of isolation                                                                                                                   | No                     |
| Proximal humeral fracture, screened positive                                                                                                                               | No                     |
| Fall and syncope likely secondary to polypharmacy                                                                                                                          | No                     |
| Alcohol Detoxification, mild URI symptoms                                                                                                                                  | No                     |
| Bilateral Ureteral stones, right flank pain, tested positive for COVID-19 18 days before admission. COVID not mentioned in hospitalizations                                | No                     |
| Malaise, shortness of breath, mild COVID-19 infection                                                                                                                      | Yes                    |
| Cervical myelopathy, status-post C3 to C5 laminoplasty, asymptomatic COVID-19 infection, discovered during screening.                                                      | No                     |
| COVID-19 infection, malaise                                                                                                                                                | Yes                    |
| Recurrent urinary tract infection and COVID-19 related diarrhea                                                                                                            | Yes                    |
| Alcohol use disorder, moderate, asymptomatic COVID-19 infection                                                                                                            | No                     |
| Cord compression from multiple myeloma, asymptomatic COVID-19 infection                                                                                                    | No                     |
| Tension pneumothorax in setting of metastatic esophageal cancer, asymptomatic COVID-19 infection                                                                           | No                     |
| COVID-19 infection, syncope, diarrhea                                                                                                                                      | Yes                    |
| Dyspnea on exertion and chest pain concerning for unstable angina or pulmonary, COVID-19 positive one month before                                                         | No                     |
| Head trauma secondary to mechanical fall, asymptomatic COVID-19, alcohol abuse                                                                                             | No                     |
| Presenting from Community Living Center for altered mental status, found to have urinary tract infection and hypernatremia, COVID-19 one month ago                         | No                     |
| Nausea, vomiting, diarrhea likely secondary to COVID-19 and uremia                                                                                                         | Yes                    |
| Patient admitted with diabetes; right-sided weakness and fatigue, found to be hypoglycemic, negative stroke work up; labeled as incidental COVID-19 infection by care team | No                     |
| Iron deficiency anemia secondary to recurrent gastrointestinal bleeding                                                                                                    | No                     |
| Bipolar Type I disorder, depressed episode (severe), incidental COVID-19 with mild symptoms                                                                                | Yes                    |
| COVID-19 illness and mild acute kidney injury                                                                                                                              | Yes                    |
| Chest pain, palpitations, and pain in left leg after running out of hydrocodone, asymptomatic COVID-19                                                                     | No                     |
| COVID-19 with resolved acute hypoxic respiratory failure                                                                                                                   | Yes                    |
| Referred to Emergency Department for admission for pacemaker placement                                                                                                     | No                     |
| Acute kidney injury on chronic kidney disease stage III, hyperkalemia, asymptomatic pyuria, fevers, asymptomatic COVID-19 found 2 days before discharge                    | No                     |
| Infarct left cerebellar region, COVID-19 with bilateral interstitial opacities on chest x-ray requiring O2 supplementation                                                 | Yes                    |
| Orthostatic hypotension, incidental COVID-19                                                                                                                               | No                     |

|                                                                                                                                                                      |     |
|----------------------------------------------------------------------------------------------------------------------------------------------------------------------|-----|
| Right obstructing ureteral stone 2mm, acute kidney injury, resolved urinary tract infection, proximal atrial fibrillation, asymptomatic COVID-19                     | No  |
| History of severe chronic obstructive pulmonary disease and chronic kidney disease stage V who presents with COVID-19 infection                                      | Yes |
| Acute on chronic anemia, shortness of breath and difficulty swallowing, incidental COVID-19                                                                          | No  |
| Abdominal pain, constipation, light headache, poor appetite                                                                                                          | No  |
| Hyponatremia and concern for gastrointestinal bleed, mild symptoms/asymptomatic COVID-19                                                                             | No  |
| Nausea and dizziness in patient who reports drinking 5-6 shots of scotch a day but recently had a binge, incidental COVID-19                                         | No  |
| 3 days of acute worsening of chronic vertigo possibly exacerbated by acute COVID-19 infection                                                                        | Yes |
| Work up and management of recurring chest pain, shortness of breath, nausea, and diaphoresis, incidental COVID-19                                                    | No  |
| Osteomyelitis of left lower extremity, COVID-19 asymptomatic                                                                                                         | No  |
| COVID-19 with gastrointestinal symptoms                                                                                                                              | Yes |
| Left hilar mass and mediastinal left anterior descending artery, COVID-19 asymptomatic                                                                               | No  |
| Multifocal intracerebral brain hemorrhage and large epidural hematoma without MLS, fracture of parietal bone, COVID-19 positive 6 weeks into 4-month hospitalization | No  |
| Homicidal ideation with auditory hallucinations, incidental COVID-19                                                                                                 | No  |
| Symptomatic anemia, incidental COVID-19                                                                                                                              | No  |
| Alzheimer's dementia admitted for now resolving acute encephalopathy and found to have urinary tract infection, prior COVID-19 infection noted                       | No  |
| Chronic obstructive pulmonary disease with acute exacerbation, likely precipitated by COVID-19                                                                       | Yes |

### eAppendix 3. Variable Definitions

| Variable               | Definition                                        |                                                                                                                                                                                                                                                                                                                                                                                                                                                                                                                                                                                                                                                                                                                                                                                                                                                                                                                                                                                                                                                                                                                                                                                                                                                                                                                                                                                                                                                                                                                                                                                                                                                                                                                                                                                                                                                                                                                                   |
|------------------------|---------------------------------------------------|-----------------------------------------------------------------------------------------------------------------------------------------------------------------------------------------------------------------------------------------------------------------------------------------------------------------------------------------------------------------------------------------------------------------------------------------------------------------------------------------------------------------------------------------------------------------------------------------------------------------------------------------------------------------------------------------------------------------------------------------------------------------------------------------------------------------------------------------------------------------------------------------------------------------------------------------------------------------------------------------------------------------------------------------------------------------------------------------------------------------------------------------------------------------------------------------------------------------------------------------------------------------------------------------------------------------------------------------------------------------------------------------------------------------------------------------------------------------------------------------------------------------------------------------------------------------------------------------------------------------------------------------------------------------------------------------------------------------------------------------------------------------------------------------------------------------------------------------------------------------------------------------------------------------------------------|
| Hypertension           | Two outpatient one inpatient code in past 2 years | I10, I11, I11.0, I11.9, I12.0, I12.9, I13, I13.0, I13.1, I13.10                                                                                                                                                                                                                                                                                                                                                                                                                                                                                                                                                                                                                                                                                                                                                                                                                                                                                                                                                                                                                                                                                                                                                                                                                                                                                                                                                                                                                                                                                                                                                                                                                                                                                                                                                                                                                                                                   |
| Heart Failure          | Two outpatient one inpatient code in past 2 years | I09.81, I11.0, I13.0, I13.2, I50.1, I50.20, I50.21, I50.22, I50.23, I50.30, I50.31, I50.32, I50.33, I50.40, I50.41, I50.42, I50.43, I50.814, I50.82, I50.83, I50.84, I50.89, I50.9                                                                                                                                                                                                                                                                                                                                                                                                                                                                                                                                                                                                                                                                                                                                                                                                                                                                                                                                                                                                                                                                                                                                                                                                                                                                                                                                                                                                                                                                                                                                                                                                                                                                                                                                                |
| Ischemic Heart Disease | Two outpatient one inpatient code in past 2 years | I20.0, I20.8, I20.9, I21.01, I21.02, I21.09, I21.11, I21.19, I21.21, I21.29, I21.A9, I22.0, I22.1, I22.2, I22.8, I22.9, I23.0, I23.1, I23.2, I23.3, I23.4, I23.5, I23.6, I23.7, I23.8, I24.0, I24.1, I24.8, I24.9, I25.10, I25.110, I25.118, I25.119, I25.2, I25.3, I25.4, I25.5, I25.6, I25.7, I25.700, I25.708, I25.709, I25.710, I25.718, I25.719, I25.720, I25.728, I25.729, I25.730, I25.738, I25.739, I25.750, I25.758, I25.759, I25.760, I25.768, I25.769, I25.790, I25.798, I25.799, I25.810, I25.811, I25.812, I25.82, I25.83, I25.84, I25.89, I25.9, I51.2, Z98.61                                                                                                                                                                                                                                                                                                                                                                                                                                                                                                                                                                                                                                                                                                                                                                                                                                                                                                                                                                                                                                                                                                                                                                                                                                                                                                                                                      |
| Diabetes               | Two outpatient one inpatient code in past 2 years | E08, E08.0, E08.00, E08.01, E08.1, E08.10, E08.11, E08.2, E08.21, E08.22, E08.29, E08.3, E08.31, E08.311, E08.319, E08.32, E08.321, E08.3211, E08.3212, E08.3213, E08.3219, E08.329, E08.3291, E08.3292, E08.3293, E08.3299, E08.33, E08.331, E08.3311, E08.3312, E08.3313, E08.3319, E08.339, E08.3391, E08.3392, E08.3393, E08.3399, E08.34, E08.341, E08.3411, E08.3412, E08.3413, E08.3419, E08.349, E08.3491, E08.3492, E08.3493, E08.3499, E08.35, E08.351, E08.3511, E08.3512, E08.3513, E08.3519, E08.352, E08.3521, E08.3522, E08.3523, E08.3529, E08.353, E08.3531, E08.3532, E08.3533, E08.3539, E08.354, E08.3541, E08.3542, E08.3543, E08.3549, E08.355, E08.3551, E08.3552, E08.3553, E08.3559, E08.359, E08.3591, E08.3592, E08.3593, E08.3599, E08.36, E08.37, E08.37X1, E08.37X2, E08.37X3, E08.37X9, E08.39, E08.4, E08.40, E08.41, E08.42, E08.43, E08.44, E08.49, E08.5, E08.51, E08.52, E08.59, E08.6, E08.61, E08.610, E08.618, E08.62, E08.620, E08.621, E08.622, E08.628, E08.63, E08.630, E08.638, E08.64, E08.641, E08.649, E08.65, E08.69, E08.8, E08.9, E09, E09.0, E09.00, E09.01, E09.1, E09.10, E09.11, E09.2, E09.21, E09.22, E09.29, E09.3, E09.31, E09.311, E09.319, E09.32, E09.321, E09.3211, E09.3212, E09.3213, E09.3219, E09.329, E09.3291, E09.3292, E09.3293, E09.3299, E09.33, E09.331, E09.3311, E09.3312, E09.3313, E09.3319, E09.339, E09.3391, E09.3392, E09.3393, E09.3399, E09.34, E09.341, E09.3411, E09.3412, E09.3413, E09.3419, E09.349, E09.3491, E09.3492, E09.3493, E09.3499, E09.35, E09.351, E09.3511, E09.3512, E09.3513, E09.3519, E09.352, E09.3521, E09.3522, E09.3523, E09.3529, E09.353, E09.3531, E09.3532, E09.3533, E09.3539, E09.354, E09.3541, E09.3542, E09.3543, E09.3549, E09.355, E09.3551, E09.3552, E09.3553, E09.3559, E09.359, E09.3591, E09.3592, E09.3593, E09.3599, E09.36, E09.37, E09.37X1, E09.37X2, E09.37X3, E09.37X9, E09.39, E09.4, E09.40, |

E09.41, E09.42, E09.43, E09.44, E09.49, E09.5, E09.51, E09.52, E09.59, E09.6, E09.61, E09.610, E09.618, E09.62, E09.620, E09.621, E09.622, E09.628, E09.63, E09.630, E09.638, E09.64, E09.641, E09.649, E09.65, E09.69, E09.8, E09.9, E10, E10.1, E10.10, E10.11, E10.2, E10.21, E10.22, E10.29, E10.3, E10.31, E10.311, E10.319, E10.32, E10.321, E10.3211, E10.3212, E10.3213, E10.3219, E10.329, E10.3291, E10.3292, E10.3293, E10.3299, E10.33, E10.331, E10.3311, E10.3312, E10.3313, E10.3319, E10.339, E10.3391, E10.3392, E10.3393, E10.3399, E10.34, E10.341, E10.3411, E10.3412, E10.3413, E10.3419, E10.349, E10.3491, E10.3492, E10.3493, E10.3499, E10.35, E10.351, E10.3511, E10.3512, E10.3513, E10.3519, E10.352, E10.3521, E10.3522, E10.3523, E10.3529, E10.353, E10.3531, E10.3532, E10.3533, E10.3539, E10.354, E10.3541, E10.3542, E10.3543, E10.3549, E10.355, E10.3551, E10.3552, E10.3553, E10.3559, E10.359, E10.3591, E10.3592, E10.3593, E10.3599, E10.36, E10.37, E10.37X1, E10.37X2, E10.37X3, E10.37X9, E10.39, E10.4, E10.40, E10.41, E10.42, E10.43, E10.44, E10.49, E10.5, E10.51, E10.52, E10.59, E10.6, E10.61, E10.610, E10.618, E10.62, E10.620, E10.621, E10.622, E10.628, E10.63, E10.630, E10.638, E10.64, E10.641, E10.649, E10.65, E10.69, E10.8, E10.9, E11, E11.0, E11.00, E11.01, E11.1, E11.10, E11.11, E11.2, E11.21, E11.22, E11.29, E11.3, E11.31, E11.311, E11.319, E11.32, E11.321, E11.3211, E11.3212, E11.3213, E11.3219, E11.329, E11.3291, E11.3292, E11.3293, E11.3299, E11.33, E11.331, E11.3311, E11.3312, E11.3313, E11.3319, E11.339, E11.3391, E11.3392, E11.3393, E11.3399, E11.34, E11.341, E11.3411, E11.3412, E11.3413, E11.3419, E11.349, E11.3491, E11.3492, E11.3493, E11.3499, E11.35, E11.351, E11.3511, E11.3512, E11.3513, E11.3519, E11.352, E11.3521, E11.3522, E11.3523, E11.3529, E11.353, E11.3531, E11.3532, E11.3533, E11.3539, E11.354, E11.3541, E11.3542, E11.3543, E11.3549, E11.355, E11.3551, E11.3552, E11.3553, E11.3559, E11.359, E11.3591, E11.3592, E11.3593, E11.3599, E11.36, E11.37, E11.37X1, E11.37X2, E11.37X3, E11.37X9, E11.39, E11.4, E11.40, E11.41, E11.42, E11.43, E11.44, E11.49, E11.5, E11.51, E11.52, E11.59, E11.6, E11.61, E11.610, E11.618, E11.62, E11.620, E11.621, E11.622, E11.628, E11.63, E11.630, E11.638, E11.64, E11.641, E11.649, E11.65, E11.69, E11.8, E11.9, E13, E13.0, E13.00, E13.01, E13.1, E13.10, E13.11, E13.2, E13.21, E13.22, E13.29, E13.3, E13.31, E13.311, E13.319, E13.32, E13.321, E13.3211, E13.3212, E13.3213, E13.3219, E13.329, E13.3291, E13.3292, E13.3293, E13.3299, E13.33, E13.331, E13.3311, E13.3312, E13.3313, E13.3319, E13.339, E13.3391, E13.3392, E13.3393, E13.3399, E13.34, E13.341, E13.3411, E13.3412, E13.3413, E13.3419, E13.349, E13.3491, E13.3492, E13.3493, E13.3499, E13.35, E13.351, E13.3511, E13.3512, E13.3513, E13.3519, E13.352, E13.3521, E13.3522, E13.3523, E13.3529, E13.353, E13.3531, E13.3532, E13.3533, E13.3539, E13.354, E13.3541, E13.3542, E13.3543, E13.3549, E13.355, E13.3551, E13.3552, E13.3553,

|                                           |                                                                                                                                                                                                                                                                                  |                                                                                                                                                                                                                                                                                                                                                                                                                                                                                                                                                                                                                                                                                                                                                                                                                                                                 |
|-------------------------------------------|----------------------------------------------------------------------------------------------------------------------------------------------------------------------------------------------------------------------------------------------------------------------------------|-----------------------------------------------------------------------------------------------------------------------------------------------------------------------------------------------------------------------------------------------------------------------------------------------------------------------------------------------------------------------------------------------------------------------------------------------------------------------------------------------------------------------------------------------------------------------------------------------------------------------------------------------------------------------------------------------------------------------------------------------------------------------------------------------------------------------------------------------------------------|
|                                           |                                                                                                                                                                                                                                                                                  | E13.3559, E13.359, E13.3591, E13.3592, E13.3593, E13.3599, E13.36, E13.37, E13.37X1, E13.37X2, E13.37X3, E13.37X9, E13.39, E13.4, E13.40, E13.41, E13.42, E13.43, E13.44, E13.49, E13.5, E13.51, E13.52, E13.59, E13.6, E13.61, E13.610, E13.618, E13.62, E13.620, E13.621, E13.622, E13.628, E13.63, E13.630, E13.638, E13.64, E13.641, E13.649, E13.65, E13.69, E13.8, E13.9                                                                                                                                                                                                                                                                                                                                                                                                                                                                                  |
| Stroke or Transient Ischemic Attack (TIA) | Two outpatient one inpatient code in past 2 years                                                                                                                                                                                                                                | G45, G45.1, G45.3, G45.8, G45.9                                                                                                                                                                                                                                                                                                                                                                                                                                                                                                                                                                                                                                                                                                                                                                                                                                 |
| COPD or Bronchiectasis                    | Two outpatient one inpatient code in past 2 years                                                                                                                                                                                                                                | J41, J41.0, J41.1, J41.8, J42, J43, J43.0, J43.1, J43.2, J43.8, J43.9, J44, J44.0, J44.1, J44.9                                                                                                                                                                                                                                                                                                                                                                                                                                                                                                                                                                                                                                                                                                                                                                 |
| Cirrhosis                                 | Two outpatient one inpatient code in past 2 years                                                                                                                                                                                                                                | B19.0, B19.11, B19.21, K65.2, K70.11, K70.2, K70.3, K70.30, K70.31, K70.41, K70.9, K71.11, K71.51, K71.7, K72.01, K72.11, K72.91, K74, K74.00, K74.01, K74.02, K74.1, K74.2, K74.3, K74.4, K74.5, K74.6, K74.60, K74.69, K76.6, K76.7, K76.81, I85, I85.0, I85.00, I85.01, I85.1, I85.10, I85.11, R18.8                                                                                                                                                                                                                                                                                                                                                                                                                                                                                                                                                         |
| Dialysis                                  | Any single code in prior 6 months                                                                                                                                                                                                                                                | VA algorithm, code available upon request                                                                                                                                                                                                                                                                                                                                                                                                                                                                                                                                                                                                                                                                                                                                                                                                                       |
| Chronic Kidney Disease                    | Most recent GFR prior to booster dose                                                                                                                                                                                                                                            | Severe CKD was defined as GFR<30                                                                                                                                                                                                                                                                                                                                                                                                                                                                                                                                                                                                                                                                                                                                                                                                                                |
| Dementia                                  | Two outpatient one inpatient code in past 2 years                                                                                                                                                                                                                                | F01, F01.5, F01.50, F01.51, F02, F02.8, F02.80, F02.81, F03, F03.9, F03.90, F03.91, F10.27, F10.97, F13.27, F13.97, F18.17, F18.27, F18.97, F19.17, F19.27, F19.97, G30, G30.0, G30.1, G30.8, G30.9, G31.0, G31.01, G31.09, G31.83                                                                                                                                                                                                                                                                                                                                                                                                                                                                                                                                                                                                                              |
| Immunocompromised                         | <ol style="list-style-type: none"> <li>1) Receipt IV chemotherapy in the 90 days before vaccination completion</li> <li>2) Receipt of immunosuppressant drugs</li> <li>3) Receipt of antiretroviral drugs</li> </ol>                                                             | See table below for complete list of drugs                                                                                                                                                                                                                                                                                                                                                                                                                                                                                                                                                                                                                                                                                                                                                                                                                      |
| Solid Organ Tumor                         | <p>Head and Neck Cancer</p> <p>Lung Cancer/respiratory tract</p> <p>GI Tract Cancer</p> <p>Other GI Cancer</p> <p>Endocrine cancer</p> <p>Genitourinary tract Cancer</p> <p>Prostate cancer</p> <p>CNS cancer</p> <p>Bone/limb/connective tissue cancers</p> <p>Other cancer</p> | C00, C00.0, C00.1, C00.2, C00.3, C00.4, C00.5, C00.6, C00.8, C00.9, C43.0, C4A.0, C44.00, C44.01, C44.02, C44.09, C01, C02, C02.0, C02.1, C02.2, C02.3, C02.4, C02.8, C02.9, C03, C03.0, C03.1, C03.9, C04, C04.0, C04.1, C04.8, C04.9, C05, C05.0, C05.1, C05.2, C05.8, C05.9, C06, C06.0, C06.1, C06.2, C06.8, C06.80, C06.89, C06.9, C07, C08, C08.0, C08.1, C08.9, C09, C09.0, C09.1, C09.8, C09.9, C10, C10.0, C10.1, C10.2, C10.3, C10.4, C10.8, C10.9, C11, C11.0, C11.1, C11.2, C11.3, C11.8, C11.9, C12, C13, C13.0, C13.1, C13.2, C13.8, C13.9, C14, C14.0, C14.2, C14.8, C30, C30.0, C30.1, C31.0, C31.1, C31.2, C31.3, C31.8, C31.9, C32.0, C32.1, C32.2, C32.3, C32.8, C32.9, C33, C34.00, C34.01, C34.02, C34.10, C34.11, C34.12, C34.2, C34.30, C34.31, C34.32, C34.80, C34.81, C34.82, C34.90, C34.91, C34.92, C37, C38.0, C38.1, C38.2, C38.3, |

C38.4, C38.8, C39.0, C39.9, C31, C31.0, C31.1, C31.2, C31.3, C31.8, C31.9, C37, C69, C69.0, C69.00, C69.01, C69.02, C69.1, C69.10, C69.11, C69.12, C69.2, C69.20, C69.21, C69.22, C69.3, C69.30, C69.31, C69.32, C69.4, C69.40, C69.41, C69.42, C69.5, C69.50, C69.51, C69.52, C69.6, C69.60, C69.61, C69.62, C69.8, C69.80, C69.81, C69.82, C69.9, C69.90, C69.91, C69.92, C32, C32.0, C32.1, C32.2, C32.3, C32.8, C32.9, C33, C34, C34.0, C34.00, C34.01, C34.02, C34.1, C34.10, C34.11, C34.12, C34.2, C34.3, C34.30, C34.31, C34.32, C34.8, C34.80, C34.81, C34.82, C34.9, C34.90, C34.91, C34.92, C38, C38.0, C38.1, C38.2, C38.3, C38.4, C38.8, C39, C39.0, C39.9, C45, C45.0, C45.1, C45.2, C45.7, C45.9, C15, C15.3, C15.4, C15.5, C15.8, C15.9, C16, C16.0, C16.1, C16.2, C16.3, C16.4, C16.5, C16.6, C16.8, C16.9, C17, C17.0, C17.1, C17.2, C17.3, C17.8, C17.9, C18, C18.0, C18.1, C18.2, C18.3, C18.4, C18.5, C18.6, C18.7, C18.8, C18.9, C19, C20, C21, C21.0, C21.1, C21.2, C21.8, C22, C22.0, C22.1, C22.2, C22.3, C22.4, C22.7, C22.8, C22.9, C23, C24, C24.0, C24.1, C24.8, C24.9, C25, C25.0, C25.1, C25.2, C25.3, C25.4, C25.7, C25.8, C25.9, C26, C26.0, C26.1, C46.4, C26.9, C48, C48.0, C48.1, C48.2, C48.8, C73, C74, C74.0, C74.00, C74.01, C74.02, C74.1, C74.10, C74.11, C74.12, C74.9, C74.90, C74.91, C74.92, C7A, C7A.0, C7A.00, C7A.01, C7A.010, C7A.011, C7A.012, C7A.019, C7A.02, C7A.020, C7A.021, C7A.022, C7A.023, C7A.024, C7A.025, C7A.026, C7A.029, C7A.09, C7A.090, C7A.091, C7A.092, C7A.093, C7A.094, C7A.095, C7A.096, C7A.098, C7A.1, C7A.8, C7B, C7B.0, C7B.00, C7B.01, C7B.02, C7B.03, C7B.04, C7B.09, C7B.1, C7B.8, C75, C75.0, C75.1, C75.2, C75.3, C75.4, C75.5, C75.8, C75.9, C62, C62.0, C62.00, C62.01, C62.02, C62.1, C62.10, C62.11, C62.12, C62.9, C62.90, C62.91, C62.92, C63, C63.0, C63.00, C63.01, C63.02, C63.1, C63.10, C63.11, C63.12, C63.2, C63.7, C63.8, C63.9, C64, C64.1, C64.2, C64.9, C65, C65.1, C65.2, C65.9, C67, C67.0, C67.1, C67.2, C67.3, C67.4, C67.5, C67.6, C67.7, C67.8, C67.9, C66, C66.1, C66.2, C66.9, C68, C68.0, C68.1, C68.8, C68.9, C61, C70, C70.0, C70.1, C70.9, C71, C71.0, C71.1, C71.2, C71.3, C71.4, C71.5, C71.6, C71.7, C71.8, C71.9, C72, C72.0, C72.1, C72.2, C72.20, C72.21, C72.22, C72.3, C72.30, C72.31, C72.32, C72.4, C72.40, C72.41, C72.42, C72.5, C72.50, C72.59, C72.9, C40, C40.0, C40.00, C40.01, C40.02, C40.1, C40.10, C40.11, C40.12, C40.2, C40.20, C40.21, C40.22, C40.3, C40.30, C40.31, C40.32, C40.8, C40.80, C40.81, C40.82, C40.9, C40.90, C40.91, C40.92, C41, C41.0, C41.1, C41.2, C41.3, C41.4, C41.9, C46, C46.0, C46.1, C46.2, C46.3, C46.4,



|                        |                                                                                                                                                                                                                                                                                                                                                                                                                                                |                                                                                                                                                                                                                                                                                                                                                                                                                                                                                                                                                                                                                                                                                                                                                                                                                                                                                                                                                                                                                                                                                                                                                                                                                                                                                                                                                                                                                                                                                                                                                                                                                                                                                                                            |
|------------------------|------------------------------------------------------------------------------------------------------------------------------------------------------------------------------------------------------------------------------------------------------------------------------------------------------------------------------------------------------------------------------------------------------------------------------------------------|----------------------------------------------------------------------------------------------------------------------------------------------------------------------------------------------------------------------------------------------------------------------------------------------------------------------------------------------------------------------------------------------------------------------------------------------------------------------------------------------------------------------------------------------------------------------------------------------------------------------------------------------------------------------------------------------------------------------------------------------------------------------------------------------------------------------------------------------------------------------------------------------------------------------------------------------------------------------------------------------------------------------------------------------------------------------------------------------------------------------------------------------------------------------------------------------------------------------------------------------------------------------------------------------------------------------------------------------------------------------------------------------------------------------------------------------------------------------------------------------------------------------------------------------------------------------------------------------------------------------------------------------------------------------------------------------------------------------------|
|                        |                                                                                                                                                                                                                                                                                                                                                                                                                                                | <p>C46.5, C46.50, C46.51, C46.52, C46.7, C46.9, C47, C47.0, C47.1, C47.10, C47.11, C47.12, C47.2, C47.20, C47.21, C47.22, C47.3, C47.4, C47.5, C47.6, C47.8, C47.9, C49, C49.0, C49.1, C49.10, C49.11, C49.12, C49.2, C49.20, C49.21, C49.22, C49.3, C49.4, C49.5, C49.6, C49.8, C49.9, C49.A, C49.A0, C49.A1, C49.A2, C49.A3, C49.A4, C49.A5, C49.A9, C76, C76.0, C76.1, C76.2, C76.3, C76.4, C76.40, C76.41, C76.42, C76.5, C76.50, C76.51, C76.52, C76.8, C79, C79.0, C79.00, C79.01, C79.02, C79.1, C79.10, C79.11, C79.19, C79.2, C79.3, C79.31, C79.32, C79.4, C79.40, C79.49, C79.5, C79.51, C79.52, C79.6, C79.60, C79.61, C79.62, C79.7, C79.70, C79.71, C79.72, C79.8, C79.81, C79.82, C79.89, C79.9, C78, C78.0, C78.00, C78.01, C78.02, C78.1, C78.2, C78.3, C78.30, C78.39, C78.4, C78.5, C78.6, C78.7, C78.8, C78.80, C78.89, C77, C77.0, C77.1, C77.2, C77.3, C77.4, C77.5, C77.8, C77.9, C80, C80.0, C80.1, C80.2</p>                                                                                                                                                                                                                                                                                                                                                                                                                                                                                                                                                                                                                                                                                                                                                                                      |
| Hematologic malignancy | <p>Hodgkin lymphoma<br/> Follicular lymphoma<br/> Non follicular lymphoma<br/> TNK cell lymphoma<br/> Other non-Hodgkin’s lymphoma<br/> Other specified TNK lymphoma<br/> Immunoproliferative and b cell lymphoma<br/> Multiple myeloma and plasma cell<br/> Lymphoid leukemia<br/> Myeloid leukemia<br/> Monocytic leukemia<br/> Leukemia &amp; Specified Cell Type<br/> Leukemia of unspecified cell<br/> Unspecified malignant neoplasm</p> | <p>C81, C81.0, C81.00, C81.01, C81.02, C81.03, C81.04, C81.05, C81.06, C81.07, C81.08, C81.09, C81.1, C81.10, C81.11, C81.12, C81.13, C81.14, C81.15, C81.16, C81.17, C81.18, C81.19, C81.2, C81.20, C81.21, C81.22, C81.23, C81.24, C81.25, C81.26, C81.27, C81.28, C81.29, C81.3, C81.30, C81.31, C81.32, C81.33, C81.34, C81.35, C81.36, C81.37, C81.38, C81.39, C81.4, C81.40, C81.41, C81.42, C81.43, C81.44, C81.45, C81.46, C81.47, C81.48, C81.49, C81.7, C81.70, C81.71, C81.72, C81.73, C81.74, C81.75, C81.76, C81.77, C81.78, C81.79, C81.9, C81.90, C81.91, C81.92, C81.93, C81.94, C81.95, C81.96, C81.97, C81.98, C81.99, C82, C82.0, C82.00, C82.01, C82.02, C82.03, C82.04, C82.05, C82.06, C82.07, C82.08, C82.09, C82.1, C82.10, C82.11, C82.12, C82.13, C82.14, C82.15, C82.16, C82.17, C82.18, C82.19, C82.2, C82.20, C82.21, C82.22, C82.23, C82.24, C82.25, C82.26, C82.27, C82.28, C82.29, C82.3, C82.30, C82.31, C82.32, C82.33, C82.34, C82.35, C82.36, C82.37, C82.38, C82.39, C82.4, C82.40, C82.41, C82.42, C82.43, C82.44, C82.45, C82.46, C82.47, C82.48, C82.49, C82.5, C82.50, C82.51, C82.52, C82.53, C82.54, C82.55, C82.56, C82.57, C82.58, C82.59, C82.6, C82.60, C82.61, C82.62, C82.63, C82.64, C82.65, C82.66, C82.67, C82.68, C82.69, C82.8, C82.80, C82.81, C82.82, C82.83, C82.84, C82.85, C82.86, C82.87, C82.88, C82.89, C82.9, C82.90, C82.91, C82.92, C82.93, C82.94, C82.95, C82.96, C82.97, C82.98, C82.99, C83, C83.0, C83.00, C83.01, C83.02, C83.03, C83.04, C83.05, C83.06, C83.07, C83.08, C83.09, C83.1, C83.10, C83.11, C83.12, C83.13, C83.14, C83.15, C83.16, C83.17, C83.18, C83.19, C83.3, C83.30, C83.31, C83.32, C83.33, C83.34, C83.35, C83.36, C83.37,</p> |

C83.38, C83.39, C83.5, C83.50, C83.51, C83.52, C83.53, C83.54, C83.55, C83.56, C83.57, C83.58, C83.59, C83.7, C83.70, C83.71, C83.72, C83.73, C83.74, C83.75, C83.76, C83.77, C83.78, C83.79, C83.8, C83.80, C83.81, C83.82, C83.83, C83.84, C83.85, C83.86, C83.87, C83.88, C83.89, C83.9, C83.90, C83.91, C83.92, C83.93, C83.94, C83.95, C83.96, C83.97, C83.98, C83.99, C84, C84.0, C84.00, C84.01, C84.02, C84.03, C84.04, C84.05, C84.06, C84.07, C84.08, C84.09, C84.1, C84.10, C84.11, C84.12, C84.13, C84.14, C84.15, C84.16, C84.17, C84.18, C84.19, C84.4, C84.40, C84.41, C84.42, C84.43, C84.44, C84.45, C84.46, C84.47, C84.48, C84.49, C84.6, C84.60, C84.61, C84.62, C84.63, C84.64, C84.65, C84.66, C84.67, C84.68, C84.69, C84.7, C84.70, C84.71, C84.72, C84.73, C84.74, C84.75, C84.76, C84.77, C84.78, C84.79, C84.A, C84.A0, C84.A1, C84.A2, C84.A3, C84.A4, C84.A5, C84.A6, C84.A7, C84.A8, C84.A9, C84.Z, C84.Z0, C84.Z1, C84.Z2, C84.Z3, C84.Z4, C84.Z5, C84.Z6, C84.Z7, C84.Z8, C84.Z9, C84.9, C84.90, C84.91, C84.92, C84.93, C84.94, C84.95, C84.96, C84.97, C84.98, C84.99, C85, C85.1, C85.10, C85.11, C85.12, C85.13, C85.14, C85.15, C85.16, C85.17, C85.18, C85.19, C85.2, C85.20, C85.21, C85.22, C85.23, C85.24, C85.25, C85.26, C85.27, C85.28, C85.29, C85.8, C85.80, C85.81, C85.82, C85.83, C85.84, C85.85, C85.86, C85.87, C85.88, C85.89, C85.9, C85.90, C85.91, C85.92, C85.93, C85.94, C85.95, C85.96, C85.97, C85.98, C85.99, C86, C86.0, C86.1, C86.2, C86.3, C86.4, C86.5, C86.6, C88, C88.0, C88.2, C88.3, C88.4, C88.8, C88.9, C90, C90.0, C90.00, C90.01, C90.02, C90.1, C90.10, C90.11, C90.12, C90.2, C90.20, C90.21, C90.22, C90.3, C90.30, C90.31, C90.32, C91, C91.0, C91.00, C91.01, C91.02, C91.1, C91.10, C91.11, C91.12, C91.3, C91.30, C91.31, C91.32, C91.4, C91.40, C91.41, C91.42, C91.5, C91.50, C91.51, C91.52, C91.6, C91.60, C91.61, C91.62, C91.A, C91.A0, C91.A1, C91.A2, C91.Z, C91.Z0, C91.Z1, C91.Z2, C91.9, C91.90, C91.91, C91.92, C92 C92.0, C92.00, C92.01, C92.02, C92.1, C92.10, C92.11, C92.12, C92.2, C92.20, C92.21, C92.22, C92.3, C92.30, C92.31, C92.32, C92.4, C92.40, C92.41, C92.42, C92.5, C92.50, C92.51, C92.52, C92.6, C92.60, C92.61, C92.62, C92.A, C92.A0, C92.A1, C92.A2, C92.Z, C92.Z0, C92.Z1, C92.Z2, C92.9, C92.90, C92.91, C92.92, C93, C93.0, C93.00, C93.01, C93.02, C93.1, C93.10, C93.11, C93.12, C93.3, C93.30, C93.31, C93.32, C93.Z, C93.Z0, C93.Z1, C93.Z2, C93.9, C93.90, C93.91, C93.92, C94, C94.0, C94.00, C94.01, C94.02, C94.2, C94.20, C94.21, C94.22, C94.3, C94.30, C94.31, C94.32, C94.4, C94.40, C94.41, C94.42, C94.6, C94.8, C94.80, C94.81, C94.82, C95, C95.0, C95.00, C95.01, C95.02,

|                      |                                                                     |                                                                                                                                                                                                                                                                                                                                                                                                                                                                                                                                                                                                                                                                                                                                                                                                                                                                                                                                                                                                                                                                                                                                            |
|----------------------|---------------------------------------------------------------------|--------------------------------------------------------------------------------------------------------------------------------------------------------------------------------------------------------------------------------------------------------------------------------------------------------------------------------------------------------------------------------------------------------------------------------------------------------------------------------------------------------------------------------------------------------------------------------------------------------------------------------------------------------------------------------------------------------------------------------------------------------------------------------------------------------------------------------------------------------------------------------------------------------------------------------------------------------------------------------------------------------------------------------------------------------------------------------------------------------------------------------------------|
|                      |                                                                     | C95.1, C95.10, C95.11, C95.12, C95.9, C95.90, C95.91, C95.92, C96, C96.0, C96.2, C96.20, C96.21, C96.22, C96.29, C96.4, C96.5, C96.6, C96.A                                                                                                                                                                                                                                                                                                                                                                                                                                                                                                                                                                                                                                                                                                                                                                                                                                                                                                                                                                                                |
| Current smoker       | Corporate Data Warehouse health factors file and existing algorithm | <p>ICD-10 codes, at least one code in the past year<br/>F17.200, F17.210, F17.290, Z72.0</p> <p>Tobacco use CPT code, at least one code in the past year:<br/>99406, 99407, S9075,<br/>S9453, G0436, G0437</p> <p>Clinic stop code, at least one code in the past year:<br/>707, 708</p> <p>OR</p> <p>Most recent health factor within past year indicates current smoker. Table of smoking-related health factors adapted from table available at: <a href="https://medicine.yale.edu/intmed/vacs/">https://medicine.yale.edu/intmed/vacs/</a></p>                                                                                                                                                                                                                                                                                                                                                                                                                                                                                                                                                                                        |
| Alcohol Use Disorder | Any single ICD code in past year                                    | F10.10, F10.120, F10.121, F10.129, F10.14, F10.150, F10.151, F10.159, F10.180, F10.181, F10.182, F10.188, F10.19, F10.20, F10.220, F10.221, F10.229, F10.230, F10.231, F10.232, F10.239, F10.24, F10.250, F10.251, F10.259, F10.26, F10.27, F10.280, F10.281, F10.282, F10.288, F10.29, F10.920, F10.921, F10.929, F10.94, F10.950, F10.951, F10.959, F10.96, F10.97, F10.980, F10.981, F10.982, F10.988, F10.99, G31.2, G62.1, I42.6, K29.20, K29.21, K70.0, K70.10, K70.11, K70.2, K70.30, K70.31, K70.40, K70.41, K70.9, O35.4XX0, O35.4XX1, O35.4XX2, O35.4XX3, O35.4XX4, O35.4XX5, O35.4XX9, O99.310, O99.311, O99.312, O99.313, O99.314, O99.315, Z71.4, Z71.41                                                                                                                                                                                                                                                                                                                                                                                                                                                                      |
| Drug Use Disorder    | Any single ICD code in past year                                    | F11.10, F11.120, F11.121, F11.122, F11.129, F11.13, F11.14, F11.150, F11.151, F11.159, F11.181, F11.182, F11.188, F11.19, F11.20, F11.21, F11.220, F11.221, F11.222, F11.229, F11.23, F11.24, F11.250, F11.251, F11.259, F11.281, F11.282, F11.288, F11.29, F11.90, F11.920, F11.921, F11.922, F11.929, F11.93, F11.94, F11.950, F11.951, F11.959, F11.981, F11.982, F11.988, F11.99, F12.10, F12.120, F12.121, F12.122, F12.129, F12.150, F12.151, F12.159, F12.180, F12.188, F12.19, F12.20, F12.21, F12.220, F12.221, F12.222, F12.229, F12.23, F12.250, F12.251, F12.259, F12.280, F12.288, F12.29, F12.90, F12.920, F12.921, F12.922, F12.929, F12.93, F12.950, F12.951, F12.959, F12.980, F12.988, F12.99, F13.10, F13.120, F13.121, F13.129, F13.14, F13.150, F13.151, F13.159, F13.180, F13.181, F13.182, F13.188, F13.19, F13.20, F13.21, F13.220, F13.221, F13.229, F13.230, F13.231, F13.232, F13.239, F13.24, F13.250, F13.251, F13.259, F13.26, F13.27, F13.280, F13.281, F13.282, F13.288, F13.29, F13.90, F13.920, F13.921, F13.929, F13.930, F13.931, F13.932, F13.939, F13.94, F13.950, F13.951, F13.959, F13.96, F13.97, |

|                   |                                                                                          |                                                                                                                                                                                                                                                                                                                                                                                                                                                                                                                                                                                                                                                                                                                                                                                                                                                                                                                                                                                                                                                                                                                                                                                                                                                                                                                                                                                                                                                                                                                                                                                                                                                                                                                                                                                                                                                                                                                                                                                                                                                                                    |
|-------------------|------------------------------------------------------------------------------------------|------------------------------------------------------------------------------------------------------------------------------------------------------------------------------------------------------------------------------------------------------------------------------------------------------------------------------------------------------------------------------------------------------------------------------------------------------------------------------------------------------------------------------------------------------------------------------------------------------------------------------------------------------------------------------------------------------------------------------------------------------------------------------------------------------------------------------------------------------------------------------------------------------------------------------------------------------------------------------------------------------------------------------------------------------------------------------------------------------------------------------------------------------------------------------------------------------------------------------------------------------------------------------------------------------------------------------------------------------------------------------------------------------------------------------------------------------------------------------------------------------------------------------------------------------------------------------------------------------------------------------------------------------------------------------------------------------------------------------------------------------------------------------------------------------------------------------------------------------------------------------------------------------------------------------------------------------------------------------------------------------------------------------------------------------------------------------------|
|                   |                                                                                          | F13.980, F13.981, F13.982, F13.988, F13.99, F14.10, F14.120, F14.121, F14.122, F14.129, F14.13, F14.14, F14.150, F14.151, F14.159, F14.180, F14.181, F14.182, F14.188, F14.19, F14.20, F14.21, F14.220, F14.221, F14.222, F14.229, F14.23, F14.24, F14.250, F14.251, F14.259, F14.280, F14.281, F14.282, F14.288, F14.29, F14.90, F14.920, F14.921, F14.922, F14.929, F14.93, F14.94, F14.950, F14.951, F14.959, F14.980, F14.981, F14.982, F14.988, F14.99, F15.10, F15.120, F15.121, F15.122, F15.129, F15.13, F15.14, F15.150, F15.151, F15.182, F15.188, F15.19, F15.20, F15.21, F15.220, F15.221, F15.222, F15.229, F15.23, F15.24, F15.250, F15.251, F15.259, F15.280, F15.281, F15.282, F15.288, F15.29, F15.90, F15.920, F15.921, F15.922, F15.929, F15.93, F15.94, F15.950, F15.951, F15.959, F15.980, F15.981, F15.982, F15.988, F15.99, F16.10, F16.120, F16.121, F16.122, F16.129, F16.14, F16.150, F16.151, F16.159, F16.180, F16.183, F16.188, F16.19, F16.20, F16.21, F16.220, F16.221, F16.229, F16.24, F16.250, F16.251, F16.259, F16.280, F16.283, F16.288, F16.29, F16.90, F16.920, F16.921, F16.929, F16.94, F16.950, F16.951, F16.959, F16.980, F16.983, F16.988, F16.99, F18.10, F18.120, F18.121, F18.129, F18.14, F18.150, F18.151, F18.159, F18.17, F18.180, F18.188, F18.19, F18.20, F18.21, F18.220, F18.221, F18.229, F18.24, F18.250, F18.251, F18.259, F18.27, F18.280, F18.288, F18.29, F18.90, F18.920, F18.921, F18.929, F18.94, F18.950, F18.951, F18.959, F18.97, F18.980, F18.988, F18.99, F19.10, F19.120, F19.121, F19.122, F19.129, F19.130, F19.131, F19.132, F19.139, F19.14, F19.150, F19.151, F19.159, F19.16, F19.17, F19.180, F19.181, F19.182, F19.188, F19.19, F19.20, F19.21, F19.220, F19.221, F19.222, F19.229, F19.230, F19.231, F19.232, F19.239, F19.24, F19.250, F19.251, F19.259, F19.26, F19.27, F19.280, F19.281, F19.282, F19.288, F19.29, F19.90, F19.920, F19.921, F19.922, F19.929, F19.930, F19.931, F19.932, F19.939, F19.94, F19.950, F19.951, F19.959, F19.96, F19.97, F19.980, F19.981, F19.982, F19.988, F19.99 |
| Marginally Housed | ICD codes or clinic stop codes related to marginal housing                               | ICD-10 codes, at least one code in past two years Z59.0 Homelessness Z59.1 Inadequate housing Z59.8 Other problems related to housing and economic circumstances Z59.9 Problem related to housing and economic circumstances, unspecified OR<br>Clinic Stop codes, at least one code in past two years: 507, 522, 528, 529, 530                                                                                                                                                                                                                                                                                                                                                                                                                                                                                                                                                                                                                                                                                                                                                                                                                                                                                                                                                                                                                                                                                                                                                                                                                                                                                                                                                                                                                                                                                                                                                                                                                                                                                                                                                    |
| Body Mass Index   | Used more recent measurement before index date available in the Corporate Data Warehouse |                                                                                                                                                                                                                                                                                                                                                                                                                                                                                                                                                                                                                                                                                                                                                                                                                                                                                                                                                                                                                                                                                                                                                                                                                                                                                                                                                                                                                                                                                                                                                                                                                                                                                                                                                                                                                                                                                                                                                                                                                                                                                    |
| VA Priority score | VA Priority Groups                                                                       | <a href="https://www.va.gov/health-care/eligibility/priority-groups/">https://www.va.gov/health-care/eligibility/priority-groups/</a>                                                                                                                                                                                                                                                                                                                                                                                                                                                                                                                                                                                                                                                                                                                                                                                                                                                                                                                                                                                                                                                                                                                                                                                                                                                                                                                                                                                                                                                                                                                                                                                                                                                                                                                                                                                                                                                                                                                                              |

**Immunocompromised status defined based on receipt of three classes of drugs**

- (1) Receipt IV chemotherapy in the 90 days before vaccination completion
- (2) Receipt of immunosuppressive drugs
- (3) Receipt of antiretroviral drugs

|                         |                                                                                                                                                                                                                                                                                                                                                                                                                                                                                                                                                                                                                                                                                                 |
|-------------------------|-------------------------------------------------------------------------------------------------------------------------------------------------------------------------------------------------------------------------------------------------------------------------------------------------------------------------------------------------------------------------------------------------------------------------------------------------------------------------------------------------------------------------------------------------------------------------------------------------------------------------------------------------------------------------------------------------|
| Chemotherapy            | Bendamustine, Busulfan, Carboplatin, Carmustine, Chlorambucil, Cisplatin, Cyclophosphamide, Dacarbazine, Estramustine, Ifosfamide, Lomustine, Mechlorethamine, Melphalan, Oxaliplatin, Pipobroman, Procarbazine, Streptozocin, Temozolomide, Thiotepa, Uracil Mustard, Azathioprine, Capecitabine, Cladribine, Clofarabine, Cytarabine, Floxuridine, Fludarabine, Fluorouracil, Gemcitabine, Hydroxyurea, Mercaptopurine, Methotrexate, Pentostatin, Pralatrexate, Thioguanine, Vidarabine, Daunorubicin, Doxorubicin, Epirubicin, Idarubicin, Pixantrone, Valrubicin, Vincristine, Vinblastine, Vinorelbine, Etoposide, Teniposide, Irinotecan, Mitoxantrone, Topotecan, Paclitaxel, Docetaxel |
| Immunosuppressive drugs | Abatacept, Adalimumab, Anakinra, Belimumab, Canakinumab, Certolizumab, Denosumab, Eculizumab, Etanercept, Golimumab, Infliximab, Natalizumab, Rituximab, Secukinumab, Siltuximab, Tocilizumab, Sarilumab, Ustekinumab, Vedolizumab, Tofacitinib, Baricitinib, Upadacitinib, Apremilast, Mercaptopurine, Azathioprine, Cyclophosphamide, Cyclosporine, Hydroxychloroquine, Chloroquine, Leflunomide, Methotrexate, Mycophenolate mofetil, Mycophenolic acid, Sulfasalazine, Tacrolimus, Chloroquine, Hydroxychloroquine, Prednisone, Dexamethasone, Hydrocortisone, Methylprednisolone, Cortisone, Prednisolone, Triamcinolone, Betamethasone                                                    |
| Antiretroviral drugs    | Abacavir (ABC), Didanosine (ddI), Emtricitabine (FTC), Lamivudine (3TC), Stavudine (d4T), Tenofovir (TDF), Zalcitabine (ddC), Zidovudine (ZDV, AZT), Delavirdine (DLV), Efavirenz (EFV), Etravirine (ETR), Nevirapine (NVP), Rilpivirine (RPV), Amprenavir (APV), Atazanavir (ATV), Atazanavir-cobicistat (ATV/COBI), Darunavir (DRV), Darunavir-cobicistat (DRV/COBI), Fosamprenavir (FPV), Indinavir (IDV), Lopinavir/ritonavir (LPV/r), Nelfinavir (NFV), Ritonavir (RTV), Saquinavir (SQV), Tipranavir (TPV), Enfuvirtide (T-20), Dolutegravir (DTG), Elvitegravir (EVG), Raltegravir (RAL), Maraviroc (MVC)                                                                                |

**eFigure 1. Cohort Selection in a Study of U.S. Veterans Who Received Booster Vaccination for COVID-19<sup>a</sup>**

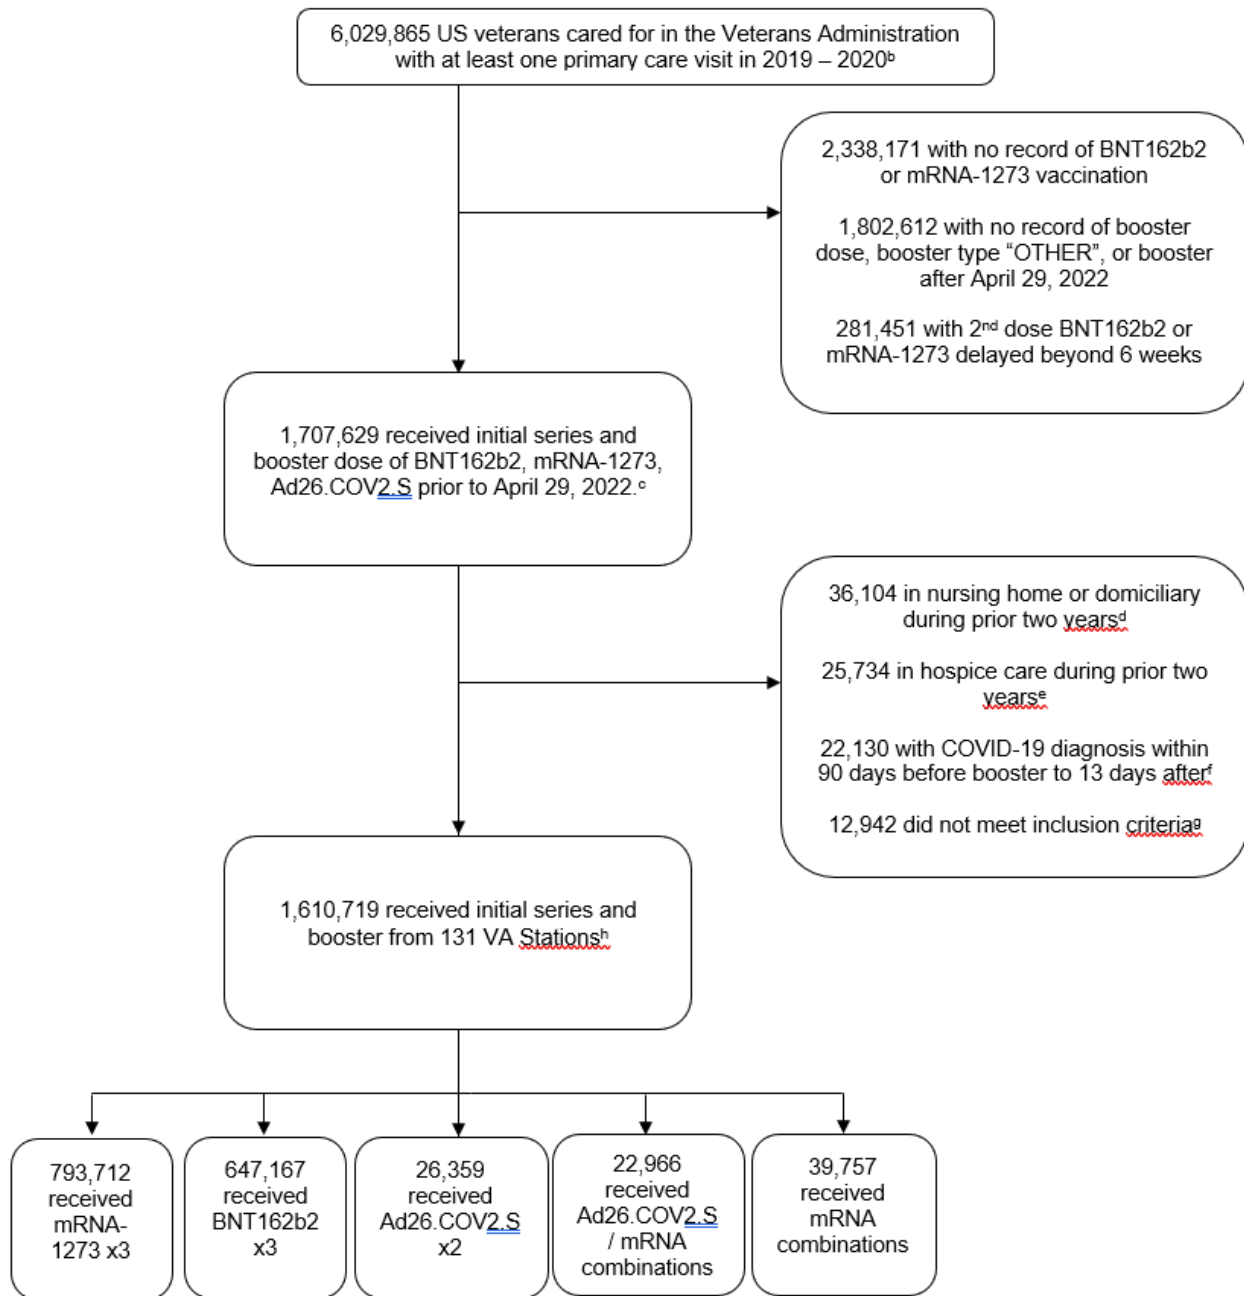

- a. Note that eligibility was based on first three doses and that a small proportion (~1%) of the overall cohort received a fourth dose before the end of follow-up because of their immunocompromised status.
- b. Primary care visits defined as an outpatient visit with primary or secondary stop code:
- 301 – general internal medicine
  - 318 – geriatrics
  - 319 – geriatrics
  - 322 – women’s health
  - 323 – primary care medicine
  - 338 – telephone primary care
  - 348 – primary care shared appt

- 350 – geripact
- c. Booster dose for BNT162b2, mRNA-1273 initial series is 5+ months after initial series. Booster dose for Ad26.COV2.S initial series is 2+ months after initial series.
- d. Nursing home stays are:
  - Any single instance of ICD-10 diagnosis code Y92.12x (nursing home as the place of occurrence of the external cause) in any context (in/out patient, fee, etc)
  - Any single instance of outpatient visit with primary or secondary stop code
    - o 119 – CNH follow up
    - o 121 – community res care
    - o 190 – adult day care
    - o 191 – community ADHC follow up
    - o 370 – Geriatrics extended care – long term)
    - o 651 – state nursing home days
    - o 658 – state home adult day healthcare
  - Any VA inpatient stay with medical service “NHCU” or specialty “NH”
- e. Hospice/palliative care is:
  - Any single instance of ICD-10 diagnosis code Z51.5 (encounter for palliative care) in any context (in/out patient, fee, etc)
  - Any single instance of outpatient visit with primary or secondary stop code
    - o 351 (hospice care)
    - o 353 (palliative care)
  - Any single instance of a patient consult where the service contains “hospice” or “palliative”
  - Any single instance of VA patient hospital stay with specialty containing “hospice” or “palliative”
  - Any single instance of a fee basis hospital stay where the purpose of stay includes “hospice” or “palliative” care.
- f. History of COVID is:
  - Any positive COVID lab appearing in the shared data resource
  - Any single instance of ICD-10 diagnosis code U07.1 (COVID-19) in any context (in/out patient, VA/fee)
- g. 12,942 patients were excluded due to either a missing Care Assessment Need (CAN) score or an unknown VA priority
- h. These 131 VA Stations are representative of all VA facilities according to the Corporate Data Warehouse

eFigure 2. Map of VA Regions

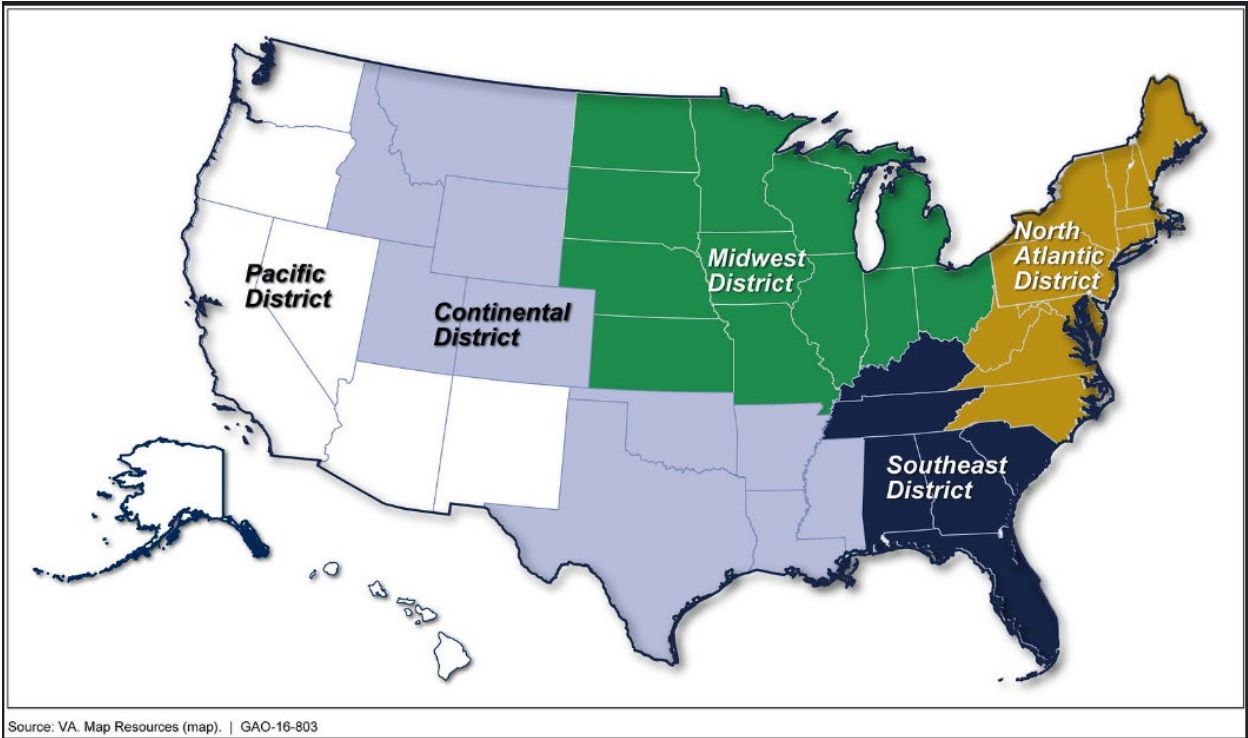



**eTable 1. Incidence of Hospitalization With COVID-19 Pneumonia/Death Following Vaccination and Boosters With Follow-up Time Ending on Date of 4<sup>th</sup> Dose, by Overall Cohort and Immunocompromised Subgroup**

|                                                                                                                                                                                                                                | Events | Cumulative incidence per 10,000 patients over 24 weeks (95% CI) |
|--------------------------------------------------------------------------------------------------------------------------------------------------------------------------------------------------------------------------------|--------|-----------------------------------------------------------------|
| <b>Full cohort, all censored at 4<sup>th</sup> dose (N=1,610,719)</b>                                                                                                                                                          |        |                                                                 |
| Overall                                                                                                                                                                                                                        | 1,432  | 8.9 (8.4, 9.4)                                                  |
| mRNA-1273 x3 (N=793,712)                                                                                                                                                                                                       | 616    | 7.8 (7.2, 8.4)                                                  |
| BNT162b2 x3 (N=674,167)                                                                                                                                                                                                        | 719    | 10.7 (9.9, 11.5)                                                |
| Ad26.COVS2.S x2 (N=26,358)                                                                                                                                                                                                     | 23     | 8.7 (5.5, 13.1)                                                 |
| mRNA combination <sup>a</sup> (N=68,025)                                                                                                                                                                                       | 52     | 7.6 (5.7, 10)                                                   |
| Ad26.COVS2.S x2 and mRNA combination <sup>b</sup> (N=48,457)                                                                                                                                                                   | 22     | 4.5 (2.8, 6.9)                                                  |
| <b>Full cohort, immunocompromised censored at 4<sup>th</sup> dose (N=1,610,719)</b>                                                                                                                                            |        |                                                                 |
| Overall                                                                                                                                                                                                                        | 1,433  | 8.9 (8.4, 9.4)                                                  |
| mRNA-1273 x3 (N=793,712)                                                                                                                                                                                                       | 617    | 10.7 (9.9, 11.5)                                                |
| BNT162b2 x3 (N=674,167)                                                                                                                                                                                                        | 719    | 8.7 (5.5, 13.1)                                                 |
| Ad26.COVS2.S x2 (N=26,358)                                                                                                                                                                                                     | 23     | 7.6 (5.7, 10)                                                   |
| mRNA combination <sup>a</sup> (N=68,025)                                                                                                                                                                                       | 52     | 4.5 (2.8, 6.9)                                                  |
| Ad26.COVS2.S x2 and mRNA combination <sup>b</sup> (N=48,457)                                                                                                                                                                   | 22     | 4.5 (2.8, 6.9)                                                  |
| <b>Immunocompromised subgroup, censored at 4<sup>th</sup> dose (N=158,684)</b>                                                                                                                                                 |        |                                                                 |
| Overall                                                                                                                                                                                                                        | 598    | 38.3 (35.3, 41.5)                                               |
| mRNA-1273 x3 (N=79,517)                                                                                                                                                                                                        | 284    | 35.7 (31.7, 40.1)                                               |
| BNT162b2 x3 (N=67,780)                                                                                                                                                                                                         | 314    | 46.3 (41.4, 51.7)                                               |
| <sup>a</sup> mRNA combination was a group that included all possible combinations in which mRNA-1273 and BNT162b2 were received.<br><sup>b</sup> Received Ad26.COVS2.S first then either mRNA-1273 or BNT162b2, or vice versa. |        |                                                                 |

**eTable 2. Characteristics of the Boosted Cohort by Combination of Vaccination Series<sup>a</sup>**

|                                                                        | mRNA-1273 x3   | BNT162b2 x3    | Ad26.COVID. S x2 | mRNA Combinations <sup>b</sup> | Ad26.COVID.S and mRNA Combinations <sup>c</sup> |
|------------------------------------------------------------------------|----------------|----------------|------------------|--------------------------------|-------------------------------------------------|
| N                                                                      | 793,712        | 674,167        | 26,358           | 68,025                         | 48,457                                          |
| Gender (%)                                                             |                |                |                  |                                |                                                 |
| Male                                                                   | 735,858 (92.7) | 614,717 (91.2) | 23,651 (89.7)    | 61,013 (89.7)                  | 43,237 (89.2)                                   |
| Female                                                                 | 57,854 (7.3)   | 59,450 (8.8)   | 2,707 (10.3)     | 7,012 (10.3)                   | 5,220 (10.8)                                    |
| Age (%)                                                                |                |                |                  |                                |                                                 |
| Median age (q1, q3)                                                    | 72 [63, 77]    | 71 [61, 75]    | 65 [56, 73]      | 67 [56, 74]                    | 62 [53, 71]                                     |
| 18-65                                                                  | 218,183 (27.5) | 221,793 (32.9) | 13,037 (49.5)    | 29,603 (43.5)                  | 27,823 (57.4)                                   |
| 65-74                                                                  | 300,167 (37.8) | 253,742 (37.6) | 9,054 (34.4)     | 21,646 (31.8)                  | 14,120 (29.1)                                   |
| 75-84                                                                  | 205,736 (25.9) | 152,523 (22.6) | 3,428 (13.0)     | 12,470 (18.3)                  | 5,245 (10.8)                                    |
| 85 or older                                                            | 69,626 (8.8)   | 46,109 (6.8)   | 839 (3.2)        | 4,306 (6.3)                    | 1,269 (2.6)                                     |
| Race <sup>d</sup> (%)                                                  |                |                |                  |                                |                                                 |
| American Indian or Alaska Native                                       | 5,082 (0.6)    | 4,364 (0.6)    | 226 (0.9)        | 392 (0.8)                      | 592 (0.9)                                       |
| Asian                                                                  | 10,051 (1.3)   | 10,555 (1.6)   | 304 (1.2)        | 1,148 (2.4)                    | 1,195 (1.8)                                     |
| Black or African American                                              | 133,845 (16.9) | 161,568 (24.0) | 5,408 (20.5)     | 12,698 (18.7)                  | 9,696 (20.0)                                    |
| Native Hawaiian or other Pacific Islander                              | 6,908 (0.9)    | 6,198 (0.9)    | 253 (1.0)        | 537 (1.1)                      | 726 (1.1)                                       |
| White                                                                  | 586,123 (73.8) | 444,463 (65.9) | 18,308 (69.5)    | 48,011 (70.6)                  | 33,255 (68.6)                                   |
| More than one race                                                     | 6,160 (0.8)    | 5,551 (0.8)    | 267 (1.0)        | 463 (1.0)                      | 643 (0.9)                                       |
| Hispanic or Latino ethnicity (regardless of race) <sup>d</sup> , n (%) | 59,514 (7.5)   | 46,458 (6.9)   | 1,701 (6.5)      | 5,040 (7.4)                    | 3,558 (7.3)                                     |
| Not Hispanic or Latino (regardless of race) <sup>d</sup> , n (%)       | 734,198 (92.5) | 627,709 (93.1) | 24,657 (93.5)    | 62,985 (92.6)                  | 44,899 (92.7)                                   |
| Currently married, n (%)                                               | 478,001 (60.2) | 386,535 (57.3) | 13,750 (52.2)    | 37,729 (55.5)                  | 23,105 (47.7)                                   |
| Urban/rural <sup>e</sup> (%)                                           |                |                |                  |                                |                                                 |
| Highly rural or unknown                                                | 36,164 (4.6)   | 13,200 (2)     | 1,331 (5.1)      | 2,245 (3.3)                    | 2,339 (4.9)                                     |
| Rural                                                                  | 25,2957 (32)   | 139,050 (20.7) | 9,522 (36.3)     | 18,206 (26.9)                  | 15,853 (33)                                     |
| Urban                                                                  | 502,105 (63.5) | 519,241 (77.3) | 15,375 (58.6)    | 47,209 (69.8)                  | 29,827 (62.1)                                   |
| VA region (%) <sup>f</sup>                                             |                |                |                  |                                |                                                 |

|                                                             |                   |                   |                     |                     |                     |
|-------------------------------------------------------------|-------------------|-------------------|---------------------|---------------------|---------------------|
| Continental                                                 | 119,468 (15.1)    | 93,481 (13.9)     | 5,065 (19.2)        | 9,209 (13.5)        | 7,148 (14.8)        |
| Midwest                                                     | 181,432 (22.9)    | 147,134 (21.8)    | 4,865 (18.5)        | 15,641 (23.0)       | 11,088 (22.9)       |
| North Atlantic                                              | 174,001 (21.9)    | 156,118 (23.2)    | 4,748 (18.0)        | 14,863 (21.8)       | 9,337 (19.3)        |
| Pacific                                                     | 126,792 (16.0)    | 122,862 (18.2)    | 4,739 (18.0)        | 13,233 (19.5)       | 9,842 (20.3)        |
| Southeast                                                   | 162,605 (20.5)    | 124,517 (18.5)    | 5,751 (21.8)        | 11,263 (16.6)       | 8,440 (17.4)        |
| BMI (%)                                                     |                   |                   |                     |                     |                     |
| Median (q1, q3)                                             | 29 [26.01, 33.34] | 29 [26.06, 33.39] | 29.8 [26.25, 34.06] | 29.7 [26.15, 34.01] | 29.5 [26.12, 33.60] |
| <18.5                                                       | 5,151 (0.7)       | 4,450 (0.7)       | 237 (1)             | 462 (0.8)           | 381 (0.9)           |
| 18.5-24.9                                                   | 120,198 (17.5)    | 102,562 (17.3)    | 3,840 (16.6)        | 10,230 (17.1)       | 7,306 (17.1)        |
| 25-29.9                                                     | 251,340 (36.6)    | 216,216 (36.4)    | 7,773 (33.5)        | 21,272 (35.5)       | 14,466 (33.9)       |
| >30                                                         | 310,919 (45.2)    | 270,762 (45.6)    | 11,325 (48.9)       | 27,956 (46.7)       | 20,520 (48.1)       |
| Comorbidities associated with severe COVID-19 illness (%)   |                   |                   |                     |                     |                     |
| Hypertension                                                | 504,921 (63.6)    | 407,188 (60.4)    | 15,086 (57.2)       | 37,795 (55.6)       | 25,703 (53.0)       |
| Diabetes                                                    | 271,408 (34.2)    | 217,655 (32.3)    | 8,116 (30.8)        | 20,036 (29.5)       | 13,218 (27.3)       |
| CKD <sup>g</sup>                                            | 188,127 (23.7)    | 143,583 (21.3)    | 4,959 (18.8)        | 13,534 (19.9)       | 7,786 (16.1)        |
| Ischemic Heart Disease                                      | 144,279 (18.2)    | 109,860 (16.3)    | 3,626 (13.8)        | 9,776 (14.4)        | 5,732 (11.8)        |
| COPD                                                        |                   |                   |                     |                     |                     |
| Bronchiectasis                                              | 100,751 (12.7)    | 72,260 (10.7)     | 2,969 (11.3)        | 6,895 (10.1)        | 5,079 (10.5)        |
| CHF                                                         | 47,612 (6.0)      | 38,216 (5.7)      | 1,285 (4.9)         | 3,633 (5.3)         | 2,268 (4.7)         |
| Immunocompromised <sup>h</sup>                              | 46,058 (5.8)      | 38,932 (5.8)      | 1,291 (4.9)         | 3,208 (4.7)         | 2,476 (5.1)         |
| Cancer solid organ <sup>i</sup>                             | 27,772 (3.5)      | 24,815 (3.7)      | 699 (2.7)           | 1,928 (2.8)         | 1,250 (2.6)         |
| Severe CKD <sup>j</sup>                                     | 25,912 (3.3)      | 17,646 (2.6)      | 678 (2.6)           | 1,861 (2.7)         | 1,341 (2.8)         |
| Stroke TIA                                                  | 21,510 (2.7)      | 18,755 (2.8)      | 627 (2.4)           | 1,766 (2.6)         | 1,159 (2.4)         |
| Dementia                                                    | 15,642 (2.0)      | 12,173 (1.8)      | 339 (1.3)           | 1,493 (2.2)         | 671 (1.4)           |
| Cirrhosis                                                   | 11,559 (1.5)      | 11,901 (1.8)      | 411 (1.6)           | 1,044 (1.5)         | 791 (1.6)           |
| Cancer lymphoma leukemia <sup>i</sup>                       | 10,070 (1.3)      | 8,022 (1.2)       | 184 (0.7)           | 533 (0.8)           | 300 (0.6)           |
| Dialysis                                                    | 4,787 (0.6)       | 4,438 (0.7)       | 75 (0.3)            | 512 (0.8)           | 197 (0.4)           |
| Cancer other <sup>i</sup>                                   | 4,639 (0.6)       | 4,738 (0.7)       | 122 (0.5)           | 283 (0.4)           | 211 (0.4)           |
| Spinal cord injury                                          | 4,109 (0.5)       | 4,031 (0.6)       | 98 (0.4)            | 397 (0.6)           | 202 (0.4)           |
| Home-based primary care                                     | 12,009 (1.5)      | 7,440 (1.1)       | 427 (1.6)           | 1,046 (1.5)         | 878 (1.8)           |
| Date of first dose of vaccination series, by 3-month period |                   |                   |                     |                     |                     |
| 12/2020 – 02/2021                                           | 535,848 (67.5)    | 422,641 (62.7)    | 2 (<0.1)            | 37,580 (55.2)       | 887 (1.8)           |

|                                                                    |                    |                    |                    |                    |                    |
|--------------------------------------------------------------------|--------------------|--------------------|--------------------|--------------------|--------------------|
| 03/2021 – 05/2021                                                  | 249,380 (31.4)     | 240,788 (35.7)     | 21,484 (81.5)      | 28,946 (42.6)      | 37,849 (78.1)      |
| 06/2021 – 08/2021                                                  | 7,807 (1.0)        | 9,729 (1.4)        | 4,202 (15.9)       | 1,371 (2.0)        | 8,712 (18.0)       |
| 09/2021 – 11/2021                                                  | 677 (0.1)          | 1,009 (0.1)        | 588 (2.2)          | 128 (0.2)          | 872 (1.8)          |
| 12/2021 – 02/2022                                                  | 0 (<0.1)           | 0 (<0.1)           | 82 (0.3)           | 0 (<0.1)           | 137 (0.3)          |
| Reinfection with COVID-19 <sup>k</sup>                             | 36,489 (4.6)       | 34,801 (5.2)       | 1,898 (7.2)        | 4,070 (6.0)        | 3,804 (7.9)        |
| Social and behavioral risk factors (%)                             |                    |                    |                    |                    |                    |
| Current smoker                                                     | 160,482 (20.2)     | 135,378 (20.1)     | 7,851 (29.8)       | 15,446 (22.7)      | 14,815 (30.6)      |
| Alcohol use disorder <sup>l</sup>                                  | 52,909 (6.7)       | 49,103 (7.3)       | 2,464 (9.3)        | 5,813 (8.5)        | 5,336 (11.0)       |
| Substance use <sup>m</sup>                                         | 31,986 (4.0)       | 31,258 (4.6)       | 1,622 (6.2)        | 3,587 (5.3)        | 3,736 (7.7)        |
| Housing problems <sup>n</sup>                                      | 30,777 (3.9)       | 30,234 (4.5)       | 1,748 (6.6)        | 3,724 (5.5)        | 3,911 (8.1)        |
| VA priority <sup>o</sup> (%)                                       |                    |                    |                    |                    |                    |
| 1-4                                                                | 496,221 (62.5)     | 432,293 (64.1)     | 17,005 (64.5)      | 44,282 (65.1)      | 31,309 (64.6)      |
| 5-6                                                                | 159,649 (20.1)     | 129,078 (19.1)     | 5,647 (21.4)       | 12,988 (19.1)      | 10,476 (21.6)      |
| 7-8                                                                | 137,842 (17.4)     | 112,796 (16.7)     | 3,706 (14.1)       | 10,755 (15.8)      | 6,672 (13.8)       |
| CAN score <sup>p</sup> (%)                                         |                    |                    |                    |                    |                    |
| 0-49.9                                                             | 274,822 (34.6)     | 263,101 (39.0)     | 13,043 (49.5)      | 31,421 (46.2)      | 26,199 (54.1)      |
| 50-74.9                                                            | 256,233 (32.3)     | 210,656 (31.2)     | 7,827 (29.7)       | 18,750 (27.6)      | 12,904 (26.6)      |
| 75-100                                                             | 262,657 (33.1)     | 200,410 (29.7)     | 5,488 (20.8)       | 17,854 (26.2)      | 9,354 (19.3)       |
| Median follow-up time, days (IQR)                                  | 168 (166.0, 168.0) | 168 (168.0, 168.0) | 168 (158.0, 168.0) | 168 (146.0, 168.0) | 161 (130.0, 168.0) |
| Median time elapsed between initial dose and booster, days (IQR)   | 280 (258.0, 302.0) | 258 (237.0, 282.0) | 238 (205.0, 262.0) | 284 (258.0, 312.0) | 250 (218.0, 283.0) |
| High-risk populations                                              | 744,518 (93.8)     | 619,359 (91.9)     | 23,611 (89.6)      | 59,883 (88.0)      | 41,929 (86.5)      |
| Age ≥ 65 and no high-risk comorbid conditions                      | 100,751 (12.7)     | 83,998 (12.5)      | 2,141 (8.1)        | 6,654 (9.8)        | 3,287 (6.8)        |
| High-risk comorbid conditions <sup>q</sup> (not immunocompromised) | 564,250 (71.1)     | 467,581 (69.4)     | 19,387 (73.6)      | 47,795 (70.3)      | 34,772 (71.8)      |

|                                      |               |               |             |             |             |
|--------------------------------------|---------------|---------------|-------------|-------------|-------------|
| Immunocompromised                    | 79,517 (10.0) | 67,780 (10.1) | 2,083 (7.9) | 5,434 (8.0) | 3,870 (8.0) |
| Age ≤ 65 and no co-morbid conditions | 23,876 (3.0)  | 28,063 (4.2)  | 1,321 (5.0) | 4,430 (6.5) | 3,377 (7.0) |

<sup>a</sup>Full version of Table 1 from manuscript.  
<sup>b</sup>mRNA combination was a group that included all possible combinations in which mRNA-1273 and BNT162b2 were received.  
<sup>c</sup>Received Ad26.COV2.S first then either mRNA-1273 or BNT162b2, or vice versa.  
<sup>d</sup>Race/ethnicity was assessed using self-identified data found in Veteran Health Records.  
<sup>e</sup>Urban/rural was assessed using defined based on the Rural Urban Commuting Area (RUCA) categories developed by the Department of Agriculture and Health and Human Services' Health Resource and Services Administration.  
<sup>f</sup>See eFigure 2 for map of VA regions.  
<sup>g</sup>CKD defined as having a glomerular filtration rate between 30 and 60.  
<sup>h</sup>Immunocompromised definition based on medications and history of cancer (see supplement for list of meds).  
<sup>i</sup>Cancer definition based on diagnosis codes. 2 outpatient or 1 inpatient diagnosis code in the VA (see supplement).  
<sup>j</sup>Severe CKD defined as having a glomerular filtration rate <30.  
<sup>k</sup>91 or more days prior to boosted shot.  
<sup>l</sup>Alcohol use defined as 1 outpatient or 1 inpatient code within 2 years of index.  
<sup>m</sup>Including cannabis, opioids, inhalants.  
<sup>n</sup>Housing problems defined as homelessness, inadequate housing, other problems related to housing and economic circumstances.  
<sup>o</sup>VA-defined based on factors including military service history, disability rating and income level to identify Veterans to determine enrolment priority; score ranges from 1 to 8 with 1 being the highest priority. This is a surrogate for socioeconomic status.  
<sup>p</sup>The Care Assessment Need (CAN) Score is a predictive analytic tool that estimates the relative probability of hospitalization and death within 90 days or one-year from the calculation date. The Office of Clinical Systems Development and Evaluation (CSDE – 10E2A) produces the weekly CAN Score Report to help identify the highest risk patients in a primary care panel or a cohort. We used the one-year score.  
<sup>q</sup>As defined by the CDC, older adults, people with medical conditions, who are immunocompromised, pregnant and recently pregnant people.

Abbreviations: BMI: body mass index; CHF: chronic heart failure; CKD: chronic kidney disease; COPD: chronic obstructive pulmonary disease; TIA: transient ischemic attack

**eTable 3. Characteristics of Cohort by Outcome**

|                                           | No Break-through COVID | Break-through COVID | No hospitalization with COVID-19 pneumonia or death <sup>a</sup> | Hospitalization with COVID-19 pneumonia or death <sup>a</sup> | No severe pneumonia <sup>b</sup> or death <sup>a</sup> | Severe pneumonia <sup>b</sup> or death <sup>a</sup> |
|-------------------------------------------|------------------------|---------------------|------------------------------------------------------------------|---------------------------------------------------------------|--------------------------------------------------------|-----------------------------------------------------|
| <b>N</b>                                  | 1,590,581              | 20,138              | 1,609,284                                                        | 1,435                                                         | 1,610,178                                              | 541                                                 |
| <b>Gender (%)</b>                         |                        |                     |                                                                  |                                                               |                                                        |                                                     |
| Male                                      | 1,460,528 (91.8)       | 17,948 (89.1)       | 1,477,096 (91.8)                                                 | 1,380 (96.2)                                                  | 1,477,951 (91.8)                                       | 525 (97.0)                                          |
| Female                                    | 130,053 (8.2)          | 2,190 (10.9)        | 132,188 (7.2)                                                    | 55 (3.8)                                                      | 132,227 (7.2)                                          | 16 (3.0)                                            |
| <b>Age (%)</b>                            |                        |                     |                                                                  |                                                               |                                                        |                                                     |
| <b>Mean age (q1, q3)</b>                  | 71 (62, 76)            | 68 (58, 74)         | 71 (61, 76)                                                      | 74 (69, 80)                                                   |                                                        |                                                     |
| 18-65                                     | 502,287 (31.6)         | 8,152 (40.5)        | 510,246 (31.7)                                                   | 193 (13.4)                                                    | 510,375 (31.7)                                         | 64 (11.8)                                           |
| 65-74                                     | 591,608 (37.2)         | 7,121 (35.4)        | 598,143 (37.2)                                                   | 568 (40.8)                                                    | 598,513 (37.2)                                         | 216 (39.9)                                          |
| 75-84                                     | 375,645 (23.6)         | 3,757 (18.7)        | 378,973 (23.5)                                                   | 429 (29.9)                                                    | 379,226 (23.6)                                         | 176 (32.5)                                          |
| 85 or older                               | 121,041 (7.6)          | 1,108 (5.5)         | 121,922 (7.6)                                                    | 227 (15.8)                                                    | 122,064 (7.6)                                          | 85 (15.7)                                           |
| <b>Race<sup>c</sup> (%)</b>               |                        |                     |                                                                  |                                                               |                                                        |                                                     |
| American Indian or Alaska Native          | 10,489 (0.7)           | 167 (0.9)           | 10,642 (0.7)                                                     | 14 (1)                                                        | 10,651 (0.7)                                           | 5 (1)                                               |
| Asian                                     | 22,922 (1.5)           | 331 (1.7)           | 23,247 (1.5)                                                     | 6 (0.4)                                                       | 23,251 (1.5)                                           | 2 (0.4)                                             |
| Black or African American                 | 318,318 (20.0)         | 4,897 (24.3)        | 322,939 (20.1)                                                   | 276 (19.2)                                                    | 323,115 (20.1)                                         | 100 (18.5)                                          |
| Native Hawaiian or other Pacific Islander | 12,913 (0.9)           | 171 (0.9)           | 13,072 (0.9)                                                     | 12 (0.9)                                                      | 13,081 (0.9)                                           | 3 (0.6)                                             |
| White                                     | 1,116,926 (70.2)       | 13,234 (65.7)       | 1,129,114 (70.2)                                                 | 1,046 (72.9)                                                  | 1,129,757 (70.2)                                       | 403 (74.5)                                          |
| More than one race                        | 1,116,926 (74.7)       | 13,234 (69.6)       | 1,129,114 (74.6)                                                 | 1,046 (76.5)                                                  | 1,129,757 (74.6)                                       | 403 (77.8)                                          |
| <b>Ethnicity<sup>c</sup> (%)</b>          |                        |                     |                                                                  |                                                               |                                                        |                                                     |
| Hispanic or Latino                        | 114,090 (7.2)          | 2,181 (10.8)        | 116,176 (7.2)                                                    | 95 (6.6)                                                      | 116,228 (7.2)                                          | 43 (7.9)                                            |
| Not Hispanic or Latino                    | 1,476,491 (92.8)       | 17,957 (89.2)       | 1,493,108 (92.8)                                                 | 1,340 (93.4)                                                  | 1,493,950 (92.8)                                       | 498 (92.1)                                          |
| <b>Marital Status (%)</b>                 |                        |                     |                                                                  |                                                               |                                                        |                                                     |
| Currently married                         | 928,267 (58.4)         | 10,853 (53.9)       | 938,308 (58.3)                                                   | 812 (56.6)                                                    | 938,824 (58.3)                                         | 296 (54.7)                                          |
| <b>Urban/rural<sup>d</sup> (%)</b>        |                        |                     |                                                                  |                                                               |                                                        |                                                     |
| Highly rural or unknown                   | 54,882 (3.4)           | 397 (2.0)           | 55,242 (3.4)                                                     | 37 (2.6)                                                      | 55,264 (3.4)                                           | 15 (2.8)                                            |
| Rural                                     | 431,671 (27.2)         | 3,917 (19.5)        | 435,202 (27.1)                                                   | 386 (27.0)                                                    | 435,454 (27.1)                                         | 134 (24.8)                                          |

|                                                                  | No Break-through COVID | Break-through COVID | No hospitalization with COVID-19 pneumonia or death <sup>a</sup> | Hospitalization with COVID-19 pneumonia or death <sup>a</sup> | No severe pneumonia <sup>b</sup> or death <sup>a</sup> | Severe pneumonia <sup>b</sup> or death <sup>a</sup> |
|------------------------------------------------------------------|------------------------|---------------------|------------------------------------------------------------------|---------------------------------------------------------------|--------------------------------------------------------|-----------------------------------------------------|
| Urban                                                            | 1,097,985 (69.4)       | 15,772 (78.5)       | 1,112,750 (69.4)                                                 | 1,007 (70.4)                                                  | 1,113,366 (69.4)                                       | 391 (72.4)                                          |
| <b>BMI (%)</b>                                                   |                        |                     |                                                                  |                                                               |                                                        |                                                     |
| <18.5                                                            | 10,561 (0.8)           | 120 (0.6)           | 10,658 (0.8)                                                     | 23 (1.7)                                                      | 10,672 (0.8)                                           | 9 (1.8)                                             |
| 18.5-24.9                                                        | 241,148 (17.4)         | 2,988 (16.1)        | 243,827 (17.3)                                                   | 309 (23.4)                                                    | 244,016 (17.3)                                         | 120 (24.2)                                          |
| 25-29.9                                                          | 504,589 (36.3)         | 6,478 (34.8)        | 510,617 (36.3)                                                   | 450 (34.0)                                                    | 510,899 (36.3)                                         | 168 (33.9)                                          |
| >=30                                                             | 632,474 (45.5)         | 9,008 (48.4)        | 640,942 (45.6)                                                   | 540 (40.8)                                                    | 641,283 (45.6)                                         | 199 (40.1)                                          |
| <b>Comorbidities associated with severe COVID-19 illness (%)</b> |                        |                     |                                                                  |                                                               |                                                        |                                                     |
| Hypertension                                                     | 977,195 (61.4)         | 13,498 (67.0)       | 989,474 (61.5)                                                   | 1,219 (84.9)                                                  | 990,219 (61.5)                                         | 474 (87.6)                                          |
| Diabetes                                                         | 522,783 (32.9)         | 7,650 (38.0)        | 529,658 (32.9)                                                   | 775 (54.0)                                                    | 530,123 (32.9)                                         | 310 (57.3)                                          |
| CKD <sup>e</sup>                                                 | 353,462 (22.2)         | 4,527 (22.5)        | 357,422 (22.2)                                                   | 567 (39.5)                                                    | 357,774 (22.2)                                         | 215 (39.7)                                          |
| Ischemic Heart Disease                                           | 268,798 (16.9)         | 4,475 (22.2)        | 272,689 (16.9)                                                   | 584 (40.7)                                                    | 273,034 (17.0)                                         | 239 (44.2)                                          |
| COPD                                                             | 184,631 (11.6)         | 3,323 (16.5)        | 187,426 (11.6)                                                   | 528 (36.8)                                                    | 187,771 (11.7)                                         | 183 (33.8)                                          |
| Bronchiectasis                                                   |                        | 2,135 (10.6)        |                                                                  |                                                               |                                                        |                                                     |
| CHF                                                              | 90,879 (5.7)           | 2,671 (13.3)        | 92,581 (5.8)                                                     | 433 (30.2)                                                    | 92,840 (5.8)                                           | 174 (32.2)                                          |
| Immune Compromised <sup>f</sup>                                  | 89,294 (5.6)           |                     | 91,555 (5.7)                                                     | 410 (28.6)                                                    | 91,794 (5.7)                                           | 171 (31.6)                                          |
| Cancer solid organ <sup>g</sup>                                  | 55,384 (3.5)           | 1,080 (5.4)         | 56,309 (3.5)                                                     | 155 (10.8)                                                    | 56,395 (3.5)                                           | 69 (12.8)                                           |
| Severe CKD <sup>h</sup>                                          | 46,497 (2.9)           | 941 (4.7)           | 47,260 (2.9)                                                     | 178 (12.4)                                                    | 47,359 (2.9)                                           | 79 (14.6)                                           |
| Stroke TIA                                                       | 42,993 (2.7)           | 824 (4.1)           | 43,720 (2.7)                                                     | 97 (6.8)                                                      | 43,786 (2.7)                                           | 31 (5.7)                                            |
| Dementia                                                         | 29,727 (1.9)           | 691 (2.9)           | 30,203 (1.9)                                                     | 115 (8.0)                                                     | 30,263 (1.9)                                           | 55 (10.2)                                           |
| Cirrhosis                                                        | 25,098 (1.6)           | 608 (3.0)           | 25,616 (1.6)                                                     | 90 (6.3)                                                      | 25,671 (1.6)                                           | 35 (6.5)                                            |
| Cancer lymphoma leukemia <sup>g</sup>                            | 18,521 (1.2)           | 588 (2.9)           | 18,947 (1.2)                                                     | 162 (11.3)                                                    | 19,035 (1.2)                                           | 74 (13.7)                                           |
| Dialysis                                                         | 9,591 (0.6)            | 418 (2.1)           | 9,905 (0.6)                                                      | 104 (7.2)                                                     | 9,967 (0.6)                                            | 42 (7.8)                                            |
| Cancer other <sup>g</sup>                                        | 9,730 (0.6)            | 263 (1.3)           | 9,948 (0.6)                                                      | 45 (3.1)                                                      | 9,974 (0.6)                                            | 19 (3.5)                                            |
| Spinal cord injury                                               | 8,642 (0.5)            | 195 (1.0)           | 8,812 (0.5)                                                      | 25 (1.7)                                                      | 8,825 (0.5)                                            | 12 (2.2)                                            |
| <b>Home-based primary care</b>                                   | 21,336 (1.3)           | 464 (2.3)           | 21,724 (1.3)                                                     | 76 (5.3)                                                      | 21,770 (1.4)                                           | 30 (5.5)                                            |
| <b>Vaccine quarter (%)</b>                                       |                        |                     |                                                                  |                                                               |                                                        |                                                     |
| 12/2020 – 02/2021                                                | 984,095 (61.9)         | 12,863 (63.9)       | 995,832 (61.9)                                                   | 1,126 (78.5)                                                  | 996,524 (61.9)                                         | 434 (80.2)                                          |

|                                                                        | No Break-through COVID | Break-through COVID | No hospitalization with COVID-19 pneumonia or death <sup>a</sup> | Hospitalization with COVID-19 pneumonia or death <sup>a</sup> | No severe pneumonia <sup>b</sup> or death <sup>a</sup> | Severe pneumonia <sup>b</sup> or death <sup>a</sup> |
|------------------------------------------------------------------------|------------------------|---------------------|------------------------------------------------------------------|---------------------------------------------------------------|--------------------------------------------------------|-----------------------------------------------------|
| 03/2021 – 05/2021                                                      | 571,456 (35.9)         | 6,991 (34.7)        | 578,151 (35.9)                                                   | 296 (20.6)                                                    | 578,346 (35.9)                                         | 101 (18.7)                                          |
| 06/2021 – 08/2021                                                      | 31,560 (2.0)           | 261 (1.3)           | 31,808 (2.0)                                                     | 13 (0.9)                                                      | 31,815 (2.0)                                           | 6 (1.1)                                             |
| 09/2021 – 11/2021                                                      | 3,252 (0.2)            | 22 (0.1)            | 3,274 (0.2)                                                      | 0 (0.0)                                                       | 3,274 (0.2)                                            | 0 (0.0)                                             |
| 12/2021 – 02/2022                                                      | 218 (0.0)              | 1 (0.0)             | 219 (0.0)                                                        | 0 (0.0)                                                       | 219 (0.0)                                              | 0 (0.0)                                             |
| <b>Reinfection with COVID-19<sup>i</sup></b>                           | 80,672 (5.1)           | 390 (1.9)           | 81,005 (5.0)                                                     | 57 (4.0)                                                      | 81,045 (5.0)                                           | 17 (3.1)                                            |
| <b>Social and behavioral risk factors (%)</b>                          |                        |                     |                                                                  |                                                               |                                                        |                                                     |
| Current smoker                                                         | 330,293 (20.8)         | 3,679 (18.3)        | 333,736 (20.7)                                                   | 236 (16.4)                                                    | 333,881 (20.7)                                         | 91 (16.8)                                           |
| Alcohol abuse <sup>j</sup>                                             | 113,793 (7.2)          | 1,832 (9.1)         | 115,506 (7.2)                                                    | 119 (8.3)                                                     | 115,578 (7.2)                                          | 47 (8.7)                                            |
| Substance use <sup>k</sup>                                             | 70,850 (4.5)           | 1,339 (6.6)         | 72,108 (4.5)                                                     | 81 (5.6)                                                      | 72,166 (4.5)                                           | 23 (4.3)                                            |
| Homelessness <sup>l</sup>                                              | 68,949 (4.3)           | 1,445 (7.2)         | 70,309 (4.4)                                                     | 85 (5.9)                                                      | 70,373 (4.4)                                           | 21 (3.9)                                            |
| <b>VA priority score<sup>k</sup> (%)</b>                               |                        |                     |                                                                  |                                                               |                                                        |                                                     |
| 1-4                                                                    | 1,007,008 (63.3)       | 14,102 (70.0)       | 1,020,238 (63.4)                                                 | 872 (60.8)                                                    | 1,020,771 (63.4)                                       | 339 (62.7)                                          |
| 5-6                                                                    | 314,299 (19.8)         | 3,539 (17.6)        | 317,461 (19.7)                                                   | 377 (26.3)                                                    | 317,702 (19.7)                                         | 136 (25.1)                                          |
| 7-8                                                                    | 269,274 (16.9)         | 2,497 (12.4)        | 271,585 (16.9)                                                   | 186 (13.0)                                                    | 271,705 (16.9)                                         | 66 (12.2)                                           |
| <b>CAN score<sup>m</sup> (%)</b>                                       |                        |                     |                                                                  |                                                               |                                                        |                                                     |
| 0-49.9                                                                 | 600,274 (37.7)         | 8,312 (41.3)        | 608,481 (37.8)                                                   | 105 (7.3)                                                     | 608,562 (37.8)                                         | 24 (4.4)                                            |
| 50-74.9                                                                | 501,205 (31.5)         | 5,165 (25.6)        | 506,117 (31.4)                                                   | 253 (17.6)                                                    | 506,276 (31.4)                                         | 94 (17.4)                                           |
| 75-100                                                                 | 489,102 (30.7)         | 6,661 (33.1)        | 494,686 (30.7)                                                   | 1,077 (75.1)                                                  | 495,340 (30.8)                                         | 423 (78.2)                                          |
| <b>Breakthrough outcome follow-up (median [IQR])</b>                   | 168 [166.0, 168.0]     | 75 [43.0, 107.0]    | NA                                                               | NA                                                            | NA                                                     | NA                                                  |
| <b>Hospitalization for COVID-19 pneumonia follow-up (median [IQR])</b> | NA                     | NA                  | 168 [166.0, 168.0]                                               | 82 [44.0, 115.5]                                              | NA                                                     | NA                                                  |
| <b>Hospitalization for severe COVID-19 pneumonia</b>                   | NA                     | NA                  | NA                                                               | NA                                                            | 168 [166.0, 168.0]                                     | 92 [56.0, 121.0]                                    |



|                                                                     | No Break-through COVID | Break-through COVID | No hospitalization with COVID-19 pneumonia or death <sup>a</sup> | Hospitalization with COVID-19 pneumonia or death <sup>a</sup> | No severe pneumonia <sup>b</sup> or death <sup>a</sup> | Severe pneumonia <sup>b</sup> or death <sup>a</sup> |
|---------------------------------------------------------------------|------------------------|---------------------|------------------------------------------------------------------|---------------------------------------------------------------|--------------------------------------------------------|-----------------------------------------------------|
| <b>follow-up (median [IQR])</b>                                     |                        |                     |                                                                  |                                                               |                                                        |                                                     |
| <b>Days elapsed between initial dose and booster (median [IQR])</b> | 270 [245.0, 295.0]     | 265 [240.0, 290.0]  | 270 [245.0, 295.0]                                               | 260 [231.0, 289.0]                                            | 270 [245.0, 295.0]                                     | 258 [230.0, 289.0]                                  |
| <b>Age ≤ 65 and no co-morbid conditions</b>                         | 60,166 (3.8)           | 901 (4.5)           | 61,062 (3.8)                                                     | 5 (0.3)                                                       | 61,065 (3.8)                                           | 2 (0.4)                                             |
| <b>High-risk co-morbid conditions<sup>n</sup></b>                   | 1,275,409 (80.2)       | 17,060 (84.7)       | 1,291,083 (80.2)                                                 | 1,386 (96.6)                                                  | 1,291,943 (80.2)                                       | 526 (97.2)                                          |
| <b>Immunocompromised</b>                                            | 154,707 (9.7)          | 3,977 (19.7)        | 158,055 (9.8)                                                    | 629 (43.8)                                                    | 158,419 (9.8)                                          | 265 (49.0)                                          |

<sup>a</sup>Death from all causes within 30 days of breakthrough COVID-19 infection.

<sup>b</sup>Severe pneumonia defined as having mechanical ventilation or an intubation procedure during hospitalization.

<sup>c</sup>Race/ethnicity was assessed using self-identified data found in Veteran Health Records.

<sup>d</sup>Urban/rural was assessed using defined based on the Rural Urban Commuting Area (RUCA) categories developed by the Department of Agriculture and Health and Human Services' Health Resource and Services Administration.

<sup>e</sup>CKD defined as having a glomerular filtration rate between 30 and 60.

<sup>f</sup>Immunocompromised definition based on medications and history of cancer (see supplement for list of meds).

<sup>g</sup>Cancer definition based on diagnosis codes. 2 outpatient or 1 inpatient diagnosis code in the VA (see supplement).

<sup>h</sup>Severe CKD defined as having a glomerular filtration rate <30.

<sup>i</sup>91 or more days prior to boosted shot.

<sup>j</sup>Alcohol use defined as 1 outpatient or 1 inpatient code within 2 years of index.

<sup>k</sup>Including cannabis, opioids, inhalants.

<sup>l</sup>Housing problems defined as homelessness, inadequate housing, other problems related to housing and economic circumstances.

<sup>m</sup>VA-defined based on factors including military service history, disability rating and income level to identify Veterans to determine enrolment priority; score ranges from 1 to 8 with 1 being the highest priority. This is a surrogate for socioeconomic status.

<sup>n</sup>The Care Assessment Need (CAN) Score is a predictive analytic tool that estimates the relative probability of hospitalization and death within 90 days or one-year from the calculation date. The Office of Clinical Systems Development and Evaluation (CSDE – 10E2A) produces the weekly CAN Score Report to help identify the highest risk patients in a primary care panel or a cohort. We used the one-year score. <sup>o</sup>As defined by the CDC, older adults, people with medical conditions, who are immunocompromised, pregnant and recently pregnant people.

Abbreviations: BMI: body mass index; CHF: chronic heart failure; CKD: chronic kidney disease; COPD: chronic obstructive pulmonary disease; TIA: transient ischemic attack

**eTable 4. Incidence of Outcomes Following Vaccination and Booster With mRNA-1273 x3, BNT162b2 x3, and Ad26.COVS2 x2 by Delta Variant vs Omicron Variant Eras**

| <b>Breakthrough COVID-19</b>                                                                                              |                 |                                                                              |                 |                                                                              |                                                                 |
|---------------------------------------------------------------------------------------------------------------------------|-----------------|------------------------------------------------------------------------------|-----------------|------------------------------------------------------------------------------|-----------------------------------------------------------------|
|                                                                                                                           | <b>Delta</b>    |                                                                              | <b>Omicron</b>  |                                                                              |                                                                 |
|                                                                                                                           | <b>Patients</b> | <b>Incidents over 24 weeks (95% CI)<br/><i>Events per 10,000 persons</i></b> | <b>Patients</b> | <b>Incidents over 24 weeks (95% CI)<br/><i>Events per 10,000 persons</i></b> | <b>Cumulative Incidents Ratios (95% CI) (Delta vs. Omicron)</b> |
| <b>Overall</b>                                                                                                            | 996,254         | 7.3 (6.8, 7.9)                                                               | 398,328         | 96.8 (93.8, 99.9)                                                            | 7.0 (5.8, 8.4)                                                  |
| <b>mRNA-1273 x3</b>                                                                                                       | 468,143         | 6.2 (5.5, 6.9)                                                               | 200,274         | 90.7 (86.6, 94.9)                                                            | 6.8 (5.4, 8.7)                                                  |
| <b>BNT162b2 x3</b>                                                                                                        | 474,681         | 8.6 (7.8, 9.5)                                                               | 134,701         | 107 (101.6, 112.6)                                                           | 8.1 (6.4, 10.2)                                                 |
| <b>Ad26.COVS2 x2</b>                                                                                                      | 11,565          | 8.6 (4.1, 15.9)                                                              | 8,826           | 133.7 (110.8, 159.9)                                                         | 5.6 (3, 10.4)                                                   |
| <b>Hospitalization with COVID-19 pneumonia or death<sup>a</sup></b>                                                       |                 |                                                                              |                 |                                                                              |                                                                 |
|                                                                                                                           | <b>Delta</b>    |                                                                              | <b>Omicron</b>  |                                                                              |                                                                 |
|                                                                                                                           | <b>Patients</b> | <b>Incidents over 24 weeks (95% CI)<br/><i>Events per 10,000 persons</i></b> | <b>Patients</b> | <b>Incidents over 24 weeks (95% CI)<br/><i>Events per 10,000 persons</i></b> | <b>Cumulative Incidents Ratios (95% CI) (Delta vs. Omicron)</b> |
| <b>Overall</b>                                                                                                            | 996,254         | 1.6 (1.3, 1.8)                                                               | 398,328         | 4.7 (4.1, 5.5)                                                               | 2.5 (1.8, 3.5)                                                  |
| <b>mRNA-1273 x3</b>                                                                                                       | 468,143         | 1.3 (1, 1.7)                                                                 | 200,274         | 4.4 (3.5, 5.4)                                                               | 2.6 (1.6, 4.0)                                                  |
| <b>BNT162b2 x3</b>                                                                                                        | 474,681         | 2.0 (1.6, 2.4)                                                               | 134,701         | 4.9 (3.8, 6.2)                                                               | 2.5 (1.5, 4.0)                                                  |
| <b>Ad26.COVS2 x2</b>                                                                                                      | 11,565          | NC                                                                           | 8,826           | 7.9 (3.2, 16.3)                                                              | All outcomes in omicron period                                  |
| <b>Hospitalization with severe COVID-19 pneumonia<sup>b</sup> or death<sup>a</sup></b>                                    |                 |                                                                              |                 |                                                                              |                                                                 |
|                                                                                                                           | <b>Delta</b>    |                                                                              | <b>Omicron</b>  |                                                                              |                                                                 |
|                                                                                                                           | <b>Patients</b> | <b>Incidents over 24 weeks (95% CI)<br/><i>Events per 10,000 persons</i></b> | <b>Patients</b> | <b>Incidents over 24 weeks (95% CI)<br/><i>Events per 10,000 persons</i></b> | <b>Cumulative Incidents Ratios (95% CI) (Delta vs. Omicron)</b> |
| <b>Overall</b>                                                                                                            | 996,254         | 0.5 (0.4, 0.7)                                                               | 398,328         | 1.7 (1.3, 2.2)                                                               | 2.2 (1.3, 3.9)                                                  |
| <b>mRNA-1273 x3</b>                                                                                                       | 468,143         | 0.4 (0.2, 0.6)                                                               | 200,274         | 1.7 (1.2, 2.4)                                                               | 2.7 (1.2, 6.6)                                                  |
| <b>BNT162b2 x3</b>                                                                                                        | 474,681         | 0.7 (0.4, 0.9)                                                               | 134,701         | 1.6, (1, 2.4)                                                                | 2.0 (0.9, 4.4)                                                  |
| <b>Ad26.COVS2 x2</b>                                                                                                      | 11,565          | NC                                                                           | 8,826           | NC                                                                           | All outcomes in omicron period                                  |
| <sup>a</sup> Death from all causes within 30 days of breakthrough COVID-19 infection.                                     |                 |                                                                              |                 |                                                                              |                                                                 |
| <sup>b</sup> Severe pneumonia defined as having mechanical ventilation or an intubation procedure during hospitalization. |                 |                                                                              |                 |                                                                              |                                                                 |
